# Supplementary material for: Human intestinal tissue-resident memory T cells comprise transcriptionally and functionally distinct subsets
Source: PubMed Central journal article supplement (PMC7816164; doi:10.1016/j.celrep.2020.108661), 2021-01-19
Supplement: mmc6.pdf [file mmc6.pdf]

## Human intestinal tissue-resident memory T cells comprise transcriptionally and functionally distinct subsets

### Graphical Abstract

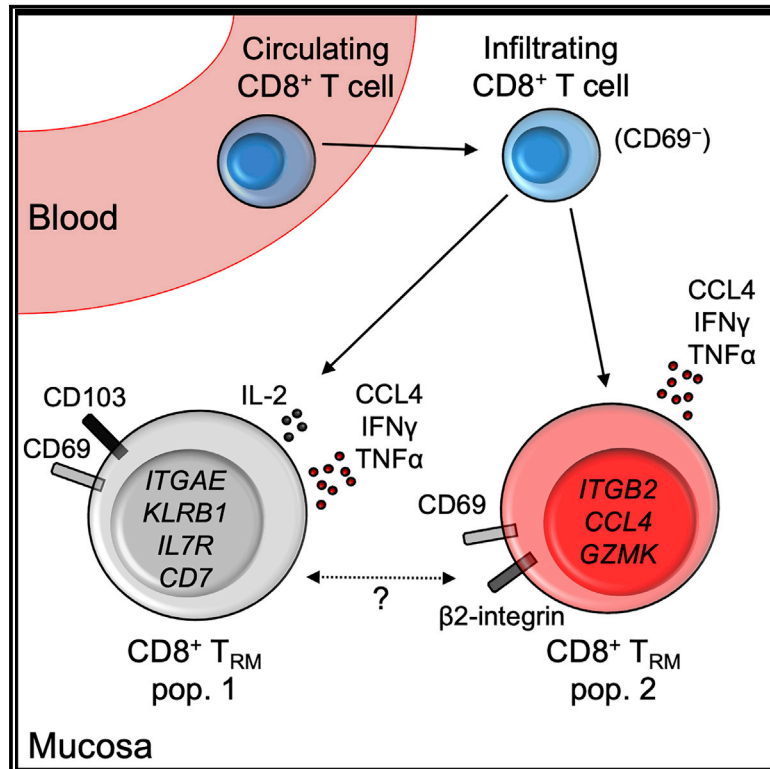

### Authors

Michael E.B. FitzPatrick, Nicholas M. Provine, Lucy C. Garner, ..., Elizabeth Soilleux, Paul Klenerman, Philip J. Allan

### Correspondence

paul.klenerman@medawar.ox.ac.uk

### In Brief

It has been historically difficult to accurately identify human tissue-resident memory T (T<sub>RM</sub>) cells. FitzPatrick et al. use a model of human intestinal transplantation to more definitively identify human T<sub>RM</sub> cells. Single-cell RNA sequencing reveals two transcriptionally distinct populations of intestinal CD8<sup>+</sup> T<sub>RM</sub> cells, which show differences in localization and function.

### Highlights

- Human intestinal transplants were used to identify bona fide T<sub>RM</sub> cells
- Single-cell RNA sequencing identifies two distinct CD8<sup>+</sup> T<sub>RM</sub> subsets
- CD103<sup>+</sup>CD69<sup>+</sup> and CD103<sup>-</sup>CD69<sup>+</sup> T<sub>RM</sub> cell subsets show distinct localization and function
- $\beta$ 2-integrin is highly expressed on CD103<sup>-</sup> T<sub>RM</sub> cells

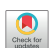

## Article

# Human intestinal tissue-resident memory T cells comprise transcriptionally and functionally distinct subsets

Michael E.B. FitzPatrick,<sup>1,7</sup> Nicholas M. Provine,<sup>1,7</sup> Lucy C. Garner,<sup>1,7</sup> Kate Powell,<sup>2</sup> Ali Amini,<sup>1</sup> Sophie L. Irwin,<sup>1</sup> Helen Ferry,<sup>1</sup> Tim Ambrose,<sup>1</sup> Peter Friend,<sup>3,4</sup> Georgios Vrakas,<sup>4</sup> Srikanth Reddy,<sup>4</sup> Elizabeth Soilleux,<sup>5</sup> Paul Klenerman,<sup>1,2,6,8,\*</sup> and Philip J. Allan<sup>1,4,6</sup>

<sup>1</sup>Translational Gastroenterology Unit, Nuffield Department of Medicine, University of Oxford, Oxford OX3 9DU, UK

<sup>2</sup>Peter Medawar Building for Pathogen Research, University of Oxford, Oxford OX1 3SY, UK

<sup>3</sup>Nuffield Department of Surgical Sciences, University of Oxford, Oxford OX3 9DU, UK

<sup>4</sup>Oxford Transplant Centre, Churchill Hospital, Oxford University Hospitals NHS Foundation Trust, Oxford OX3 7LE, UK

<sup>5</sup>Department of Pathology, University of Cambridge, Tennis Court Road, Cambridge CB2 1QP, UK

<sup>6</sup>NIHR Biomedical Research Centre, John Radcliffe Hospital, Oxford University Hospitals NHS Foundation Trust, Oxford OX3 9DU, UK

<sup>7</sup>These authors contributed equally

<sup>8</sup>Lead contact

\*Correspondence: [paul.klenerman@medawar.ox.ac.uk](mailto:paul.klenerman@medawar.ox.ac.uk)

<https://doi.org/10.1016/j.celrep.2020.108661>

## SUMMARY

Tissue-resident memory T ( $T_{RM}$ ) cells provide key adaptive immune responses in infection, cancer, and autoimmunity. However, transcriptional heterogeneity of human intestinal  $T_{RM}$  cells remains undefined. Here, we investigate transcriptional and functional heterogeneity of human  $T_{RM}$  cells through study of donor-derived  $T_{RM}$  cells from intestinal transplant recipients. Single-cell transcriptional profiling identifies two transcriptional states of  $CD8^+$   $T_{RM}$  cells, delineated by *ITGAE* and *ITGB2* expression. We define a transcriptional signature discriminating these populations, including differential expression of cytotoxicity- and residency-associated genes. Flow cytometry of recipient-derived cells infiltrating the graft, and lymphocytes from healthy gut, confirm these  $CD8^+$   $T_{RM}$  phenotypes.  $CD8^+$   $CD69^+CD103^+$   $T_{RM}$  cells produce interleukin-2 (IL-2) and demonstrate greater polyfunctional cytokine production, whereas  $\beta 2$ -integrin<sup>+</sup> $CD69^+CD103^-$   $T_{RM}$  cells have higher granzyme expression. Analysis of intestinal  $CD4^+$  T cells identifies several parallels, including a  $\beta 2$ -integrin<sup>+</sup> population. Together, these results describe the transcriptional, phenotypic, and functional heterogeneity of human intestinal  $CD4^+$  and  $CD8^+$   $T_{RM}$  cells.

## INTRODUCTION

Tissue-resident memory T ( $T_{RM}$ ) cells are a subset of long-lived T cells that reside in tissue and do not recirculate (Mackay and Kallies, 2017; Szabo et al., 2019).  $T_{RM}$  populations provide rapid, *in situ*, adaptive protection against a wide spectrum of pathogens (Gebhardt et al., 2011; Schenkel et al., 2014).  $T_{RM}$  cells also have key roles in cancer immune surveillance (Park et al., 2019) and are implicated in autoimmunity, including inflammatory bowel disease (IBD) and celiac disease (Mayassi et al., 2019; Zundler et al., 2019).  $CD8^+$   $T_{RM}$  cells have potent cytotoxic functions and produce pro-inflammatory cytokines to trigger innate and adaptive immune responses (Ariotti et al., 2014; Schenkel et al., 2014).

Murine work has advanced our understanding of  $T_{RM}$  cells substantially; however,  $T_{RM}$  phenotype, transcriptional profiles, and genetic regulation differ between mice and humans (Hombrink et al., 2016; Kumar et al., 2017; Oja et al., 2018).

Until recently, human studies of  $T_{RM}$  biology were hampered by the inability to prove long-lived tissue residency, with surface molecules CD69 and CD103 ( $\alpha E$ -integrin) used as surrogate  $T_{RM}$  markers. These were used to identify the putative transcriptional signature of human  $T_{RM}$  cells, with CD69 hypothesized as the key surrogate marker of residency (Kumar et al., 2017). However, this gene signature was derived from bulk populations, so it remains unclear whether there are transcriptionally distinct subsets within human  $T_{RM}$  cells.

Despite its expression on almost all murine and human  $T_{RM}$  cells, the use of CD69 as a residency marker has recently been questioned. CD69 restricts lymphocyte tissue egress via S1P1 inhibition but is not required for the development of functional  $T_{RM}$  cells in mice (Shiow et al., 2006; Walsh et al., 2019). CD69 can be induced via stimulation, and a proportion of  $CD69^+$  T cells in tissue are not resident, making CD69 a suboptimal residency marker (Beura et al., 2018; Sancho et al., 2005; Shiow

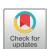

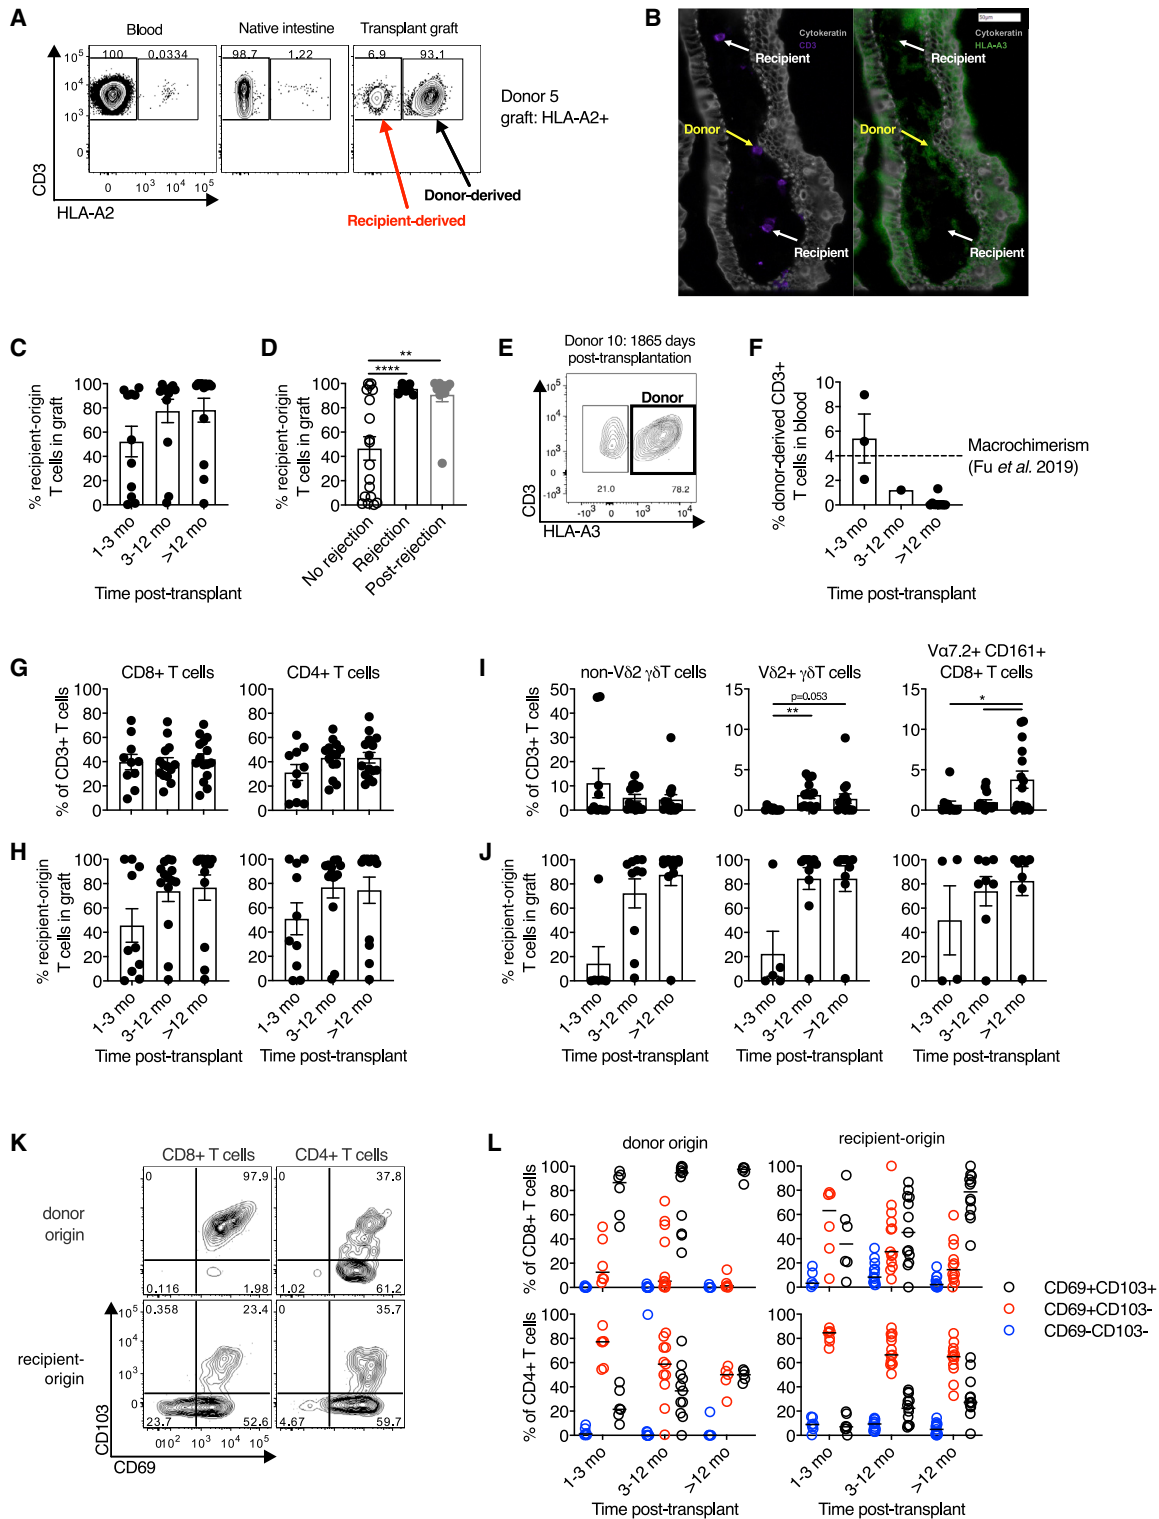

**Figure 1. Long-lived, conventional CD4<sup>+</sup> and CD8<sup>+</sup> T cell, but not unconventional T cell, populations can persist for at least 5 years in the human intestine**

(A) Representative flow cytometry plot of HLA-A2 expression on T cells from the blood, the recipient native intestinal mucosa, and the intestinal transplant graft demonstrating identification of donor- and recipient-derived populations by HLA mismatch.

(legend continued on next page)

et al., 2006). Therefore, additional phenotypic markers to identify CD103<sup>−</sup> T<sub>RM</sub> populations are required.

Recent work has exploited the human model of organ transplantation to study long-lived, donor-derived T cells, which are definitively functionally resident T<sub>RM</sub> cells (Bartolomé-Casado et al., 2019; Snyder et al., 2019; Zuber et al., 2016). Studies using this approach have demonstrated persistence of clonally identical intestinal CD8<sup>+</sup> T<sub>RM</sub> cells for up to 1 year in the small intestine (SI) (Bartolomé-Casado et al., 2019), and persistency of donor-derived T cells for 600 days after transplant (Zuber et al., 2016). This approach was also used to identify putative SI CD8<sup>+</sup> T<sub>RM</sub> cell subsets based on expression of CD103 and KLRG1, with differences in clonality, granzyme expression, and cytokine production (Bartolomé-Casado et al., 2019). However, it remains unclear whether these cell populations represent transcriptionally distinct subsets.

This work sought to examine the heterogeneity within functionally resident, donor-derived T cells in intestinal transplantation using flow cytometry and single-cell RNA sequencing (scRNA-seq). We confirmed that human SI CD4<sup>+</sup> and CD8<sup>+</sup> T<sub>RM</sub> cells can persist for 5 years after transplant. scRNA-seq identified conventional and regulatory CD4<sup>+</sup> T<sub>RM</sub> cell populations, as well as two transcriptionally distinct CD8<sup>+</sup> T<sub>RM</sub> subsets, which differed in expression of *ITGAE* (CD103,  $\alpha$ E-integrin) and *ITGB2* (CD18,  $\beta$ 2-integrin). These two populations differentially expressed putative T<sub>RM</sub>-associated genes, indicating that the gene signatures derived from bulk RNA sequencing (RNA-seq) data may be a synthesis of several transcriptomic profiles. We validated this phenotypic and functional heterogeneity in the healthy intestine, with CD103<sup>−</sup> T<sub>RM</sub> cells showing increased  $\beta$ 2-integrin expression and distinctive effector function. CD69,  $\beta$ 2-integrin, and CD103 expression changed with time post-transplant on recipient-derived, graft-infiltrating CD8<sup>+</sup> T cell populations, consistent with acquisition of T<sub>RM</sub> status. We conclude that CD69<sup>+</sup>CD103<sup>−</sup> $\beta$ 2-integrin<sup>+</sup> CD8<sup>+</sup> intestinal T cells are a transcriptionally and functionally distinct T<sub>RM</sub> cell population and suggest that  $\beta$ 2-integrin can serve as an adjunct surface marker to CD69 for CD103<sup>−</sup> T<sub>RM</sub> cells.

## RESULTS

### Long-lived, conventional CD4<sup>+</sup> and CD8<sup>+</sup> T cells, but not unconventional T cell populations, can persist for at least 5 years in the human intestine

To examine the persistence of resident T cells in the SI after transplant, we used human leukocyte antigen (HLA) allele congenic cell tracking, a method allowing discrimination of donor- and recipient-derived cells after transplantation using fluorophore-conjugated antibodies to discordant class I HLA haplotypes (Figures 1A and S1A) (Bartolomé-Casado et al., 2019; Zuber et al., 2016). The presence of SI donor- and recipient-derived T cells *in situ* was confirmed by chip cytometry (Figure 1B) (Leng et al., 2019).

Infiltration of recipient-derived T cells into the graft increased over time, with striking heterogeneity (Figure 1C). Current or previous rejection was associated with higher proportions of recipient-derived T cells in the graft (Figure 1D), consistent with prior work (Zuber et al., 2016). Conversely, two individuals had persistent, donor-derived SI T cell populations at 4 years 7 months (1,684 days) and 5 years 1 month (1,865 days) after transplant (Figure 1E and data not shown). This extends previous reports of long-lived donor chimerism in the human intestine (Bartolomé-Casado et al., 2019; Zuber et al., 2016).

Hematopoietic stem and progenitor cells can persist in the intestinal transplant graft, sometimes leading to long-term chimerism of donor-derived populations in blood (Fu et al., 2019). This could potentially allow persistence of donor-derived T cells in the graft through continuous ingress from blood, rather than via residency (Bartolomé-Casado et al., 2019). Contrasting with the work of Fu et al. (2019), flow cytometric analysis of blood collected from transplant recipients at the time of biopsy revealed the percentage of circulating donor origin T cells was extremely low beyond 3 months after transplant (median, 0.042%; 95% confidence interval [95% CI], 0%–1.22%; Figure 1F). This is far below the posited cutoff for macrochimerism of 4% (Fu et al., 2019) and is similar to background, non-specific staining in non-transplant recipients (0.01%–0.12%; Figure S1B),

(B) Representative chip cytometry image of intestinal graft mucosa demonstrating the presence of donor-derived (HLA-A3<sup>+</sup>, yellow arrows) and recipient-derived (HLA-A3<sup>−</sup>, white arrows) CD3<sup>+</sup> T cells in the lamina propria. Cytokeratin (gray); CD3 (purple); HLA-A3 (green).

(C) Percentage of recipient-origin CD3<sup>+</sup> T cells in intestinal grafts, categorized by time after transplant (n = 37; 16 subjects; means  $\pm$  SEM).

(D) Percentage of recipient-origin CD3<sup>+</sup> T cells in intestinal grafts, categorized by history of graft rejection (n = 37; 16 subjects; means  $\pm$  SEM).

(E) Flow cytometry plot of HLA-A3 expression on graft-derived T cells in one subject who demonstrated persistent donor chimerism in the intestinal graft 1,865 days (5 years and 1 month) after transplant.

(F) Percentage of donor-origin CD3<sup>+</sup> T cells in the blood of intestinal transplant recipients, categorized by time after transplant (n = 13; means  $\pm$  SEM). Dashed line at 4% represents the cutoff for significant macrochimerism from prior studies (Fu et al., 2019; Zuber et al., 2015).

(G) Conventional CD8<sup>+</sup> and CD4<sup>+</sup> T cell subsets in the small intestinal graft as a proportion of total T cells, categorized by time post-transplant (n = 39; 18 subjects; means  $\pm$  SEM).

(H) The percentage of recipient-derived T cells within conventional CD8<sup>+</sup> and CD4<sup>+</sup> T cell subsets in the intestinal graft, categorized by time after transplant (n = 37; 16 subjects; means  $\pm$  SEM).

(I) Unconventional non-V $\delta$ 2<sup>+</sup>  $\gamma$  $\delta$  T cell, V $\delta$ 2<sup>+</sup>  $\gamma$  $\delta$  T cell, and V $\alpha$ 7.2<sup>+</sup>CD161<sup>+</sup> CD8<sup>+</sup> T cell (mucosal-associated invariant T cell) subsets in the small intestinal graft as a proportion of total T cells, categorized by time after transplant (n = 39; 18 subjects; means  $\pm$  SEM).

(J) The percentage of recipient-derived T cells infiltrating the intestinal graft within unconventional non-V $\delta$ 2<sup>+</sup>  $\gamma$  $\delta$  T cell (n = 27; 12 subjects), V $\delta$ 2<sup>+</sup>  $\gamma$  $\delta$  T cell (n = 25; 12 subjects), and V $\alpha$ 7.2<sup>+</sup>CD161<sup>+</sup> CD8<sup>+</sup> T cell (n = 20; 12 subjects) subsets, categorized by time after transplant (means  $\pm$  SEM).

(K) Representative flow cytometry plot of CD69 and CD103 expression on donor- and recipient-derived CD8<sup>+</sup> and CD4<sup>+</sup> T cells in the intestinal graft.

(L) Percentage of donor- and recipient-derived CD8<sup>+</sup> and CD4<sup>+</sup> T cells in the intestinal graft co-expressing CD69 and CD103 categorized by time after transplant (n = 35; 16 subjects; median marked with black line).

For further analysis of surface marker expression, rare populations with fewer than 10 cells were excluded from the analysis (J and L). Statistical analysis performed with one-way ANOVA with Dunnett's multiple-comparison test. \*p  $\leq$  0.05, \*\*p  $\leq$  0.01.

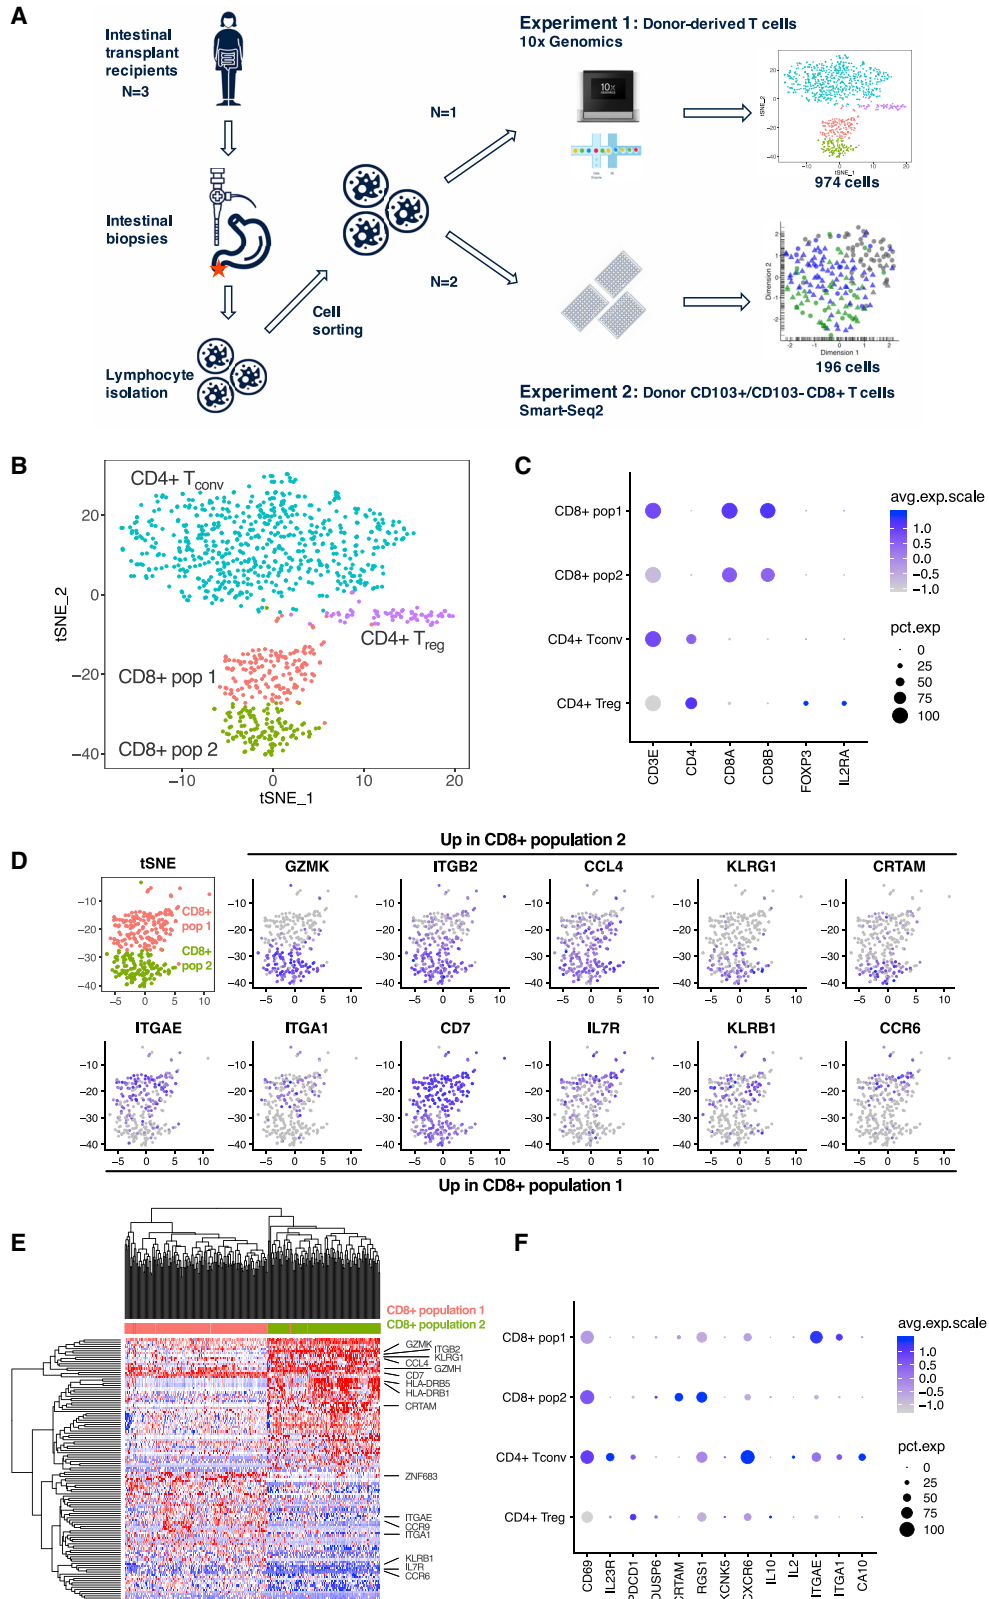

(legend on next page)

indicating that continuous replacement is unlikely to be a confounding mechanism for sustained donor chimerism in our cohort. This discrepancy in circulating chimerism between studies may be due to differences in transplant procedure (multi-visceral versus isolated intestinal transplant in this study) and recipient age (pediatric versus adult in this study) (Fu et al., 2019; Zuber et al., 2015).

Conventional CD4<sup>+</sup> and CD8<sup>+</sup> T cells dominated in the graft after transplant (Figure 1G) and demonstrated similar kinetics of increased recipient-derived cells over time (Figure 1H). We also examined the dynamics of unconventional T cell subsets after transplant because their residency characteristics in humans are poorly understood (Figure S1C). CD161<sup>+</sup>Vα7.2<sup>+</sup> CD8<sup>+</sup> T cells (consistent with mucosal-associated invariant T [MAIT] cells) and Vδ2<sup>+</sup> γδ T cells (which possess analogous innate-like functions to MAIT cells [Gutierrez-Arcelus et al., 2019; Provine et al., 2018]) were rare in the graft after transplant, recovering to expected frequencies after 1 year (Figure 1I). However, the non-Vδ2 γδ T cell subsets demonstrated different dynamics, with this population present at early time points. Unconventional T cell subsets demonstrated similar replacement kinetics (Figure 1J). It is unclear whether the low innate-like T cell frequency post-transplant is due to differences in residency characteristics or to increased sensitivity to the ischemic insult of surgery or perioperative conditioning regimes.

We examined CD69 and CD103 expression on donor- and recipient-derived CD4<sup>+</sup> and CD8<sup>+</sup> T cell populations in the intestinal graft. CD103 expression was restricted to CD69<sup>+</sup> cells, with a greater proportion of CD8<sup>+</sup> cells expressing CD103 than CD4<sup>+</sup> cells (Figure 1K), in keeping with prior work (Bartolomé-Casado et al., 2020; Kumar et al., 2017). Donor-derived T cells showed near-ubiquitous expression of CD69 consistent with a lack of recent migration from blood and comprised fewer CD69<sup>−</sup> cells than recipient-derived populations for both CD8<sup>+</sup> (median 0.03% versus 4.17%,  $p < 0.0001$ , Wilcoxon signed-rank test) and CD4<sup>+</sup> (median 0.10% versus 5.65%,  $p < 0.0001$ , Wilcoxon signed-rank test) cells (Figure 1L). Although recent murine data showed no functional requirement for CD69 to establish intestinal residency, these data suggest that lack of CD69 expression on intestinal T cells is a good surrogate for definitively non-resident populations (Walsh et al., 2019). Recipient-derived CD4<sup>+</sup> and CD8<sup>+</sup> T cell populations showed increasing expression of CD103 with time, consistent with the acquisition of a T<sub>RM</sub> phenotype, as in prior work (Zuber et al., 2016). We have previously

shown higher expression of the C-type, lectin-like receptor CD161 on intestinal CD103<sup>+</sup> CD8<sup>+</sup> T cells (Fergusson et al., 2016); here, a greater proportion of donor-derived CD8<sup>+</sup> T cells expressed CD161, consistent with an association with residency (Figures S1D and S1E).

### scRNA-seq delineates transcriptionally distinct states within CD4<sup>+</sup> and CD8<sup>+</sup> T<sub>RM</sub> cell populations

The persistence of CD103<sup>−</sup> and CD103<sup>+</sup> donor-derived T cells up to 5 years after transplant, and the enrichment of CD103<sup>+</sup> recipient-derived T cells at later time points, raised the possibility that CD103<sup>−</sup> and CD103<sup>+</sup> T cells represented distinct cell states. To test that hypothesis, we performed droplet-based scRNA-seq of sorted donor-derived, graft-resident T<sub>RM</sub> cells from a single subject 1 year after transplant (experiment 1; Figure 2A); 1,774 cells were captured and sequenced, with 974 cells remaining after filtering (Figure S2A).

Four transcriptionally distinct clusters were identified (Figure 2B): conventional CD4<sup>+</sup> T cells, regulatory CD4<sup>+</sup> T cells expressing *IL2RA* and *FOXP3*, and two clusters of conventional CD8<sup>+</sup> T cells (Figure 2C). The differentially expressed genes (DEGs) between the two populations of donor-derived CD8<sup>+</sup> T<sub>RM</sub> cells (hereafter, CD8<sup>+</sup> populations 1 and 2) were analyzed (Figure 2D). Population 1 expressed *ITGAE* (CD103), as well as more *CD7*, *IL7R* (CD127), *KLRB1* (CD161), and the chemokine receptor *CCR6* (Figures 2D and 2E). IL-7, a stromal-derived homeostatic cytokine that provides survival and proliferative signals to lymphocytes (Raeber et al., 2018), is required for epidermal T<sub>RM</sub> cell persistence (Adachi et al., 2015), and *CD127* is highly expressed in SI memory T cells (Thome et al., 2014). The differential expression of *IL7R* suggests differences in the mechanisms, or nature, of T<sub>RM</sub> cell persistence between the two populations (Raeber et al., 2018).

Conversely, CD8<sup>+</sup> population 2 expressed low levels of *ITGAE* but high levels of *KLRG1*, as well as cytotoxic granzyme molecules and class II major histocompatibility complex (MHC) molecules (Figures 2D and 2E). Surface KLRG1 expression can delineate two putative SI CD103<sup>−</sup> CD8<sup>+</sup> T cell subsets with similar residency characteristics (Bartolomé-Casado et al., 2019). However, population 2 did not sub-cluster further, based on *KLRG1* gene expression, suggesting that these are not transcriptionally distinct states. Of particular interest, the integrin *ITGB2* was highly expressed by the CD103<sup>−</sup> CD8<sup>+</sup> population 2. β2-integrin can form heterodimers with four α-integrins

### Figure 2. Single-cell RNA sequencing (scRNA-seq) delineates transcriptionally distinct states within CD4<sup>+</sup> and CD8<sup>+</sup> T<sub>RM</sub> cell populations

- (A) Schematic of two scRNA-seq experiments. Biopsies of small intestinal transplant tissue were collected from subjects at endoscopy, then dissociated to isolate intestinal lymphocytes. These were sorted by fluorescence-activated cell sorting (FACS), first with bulk sorting of donor-derived T cells in experiment 1, then with index sorting of donor-derived CD103<sup>−</sup> and CD103<sup>+</sup> T cells in experiment 2, before scRNA-seq library preparation and sequencing using the 10x Genomics platform (experiment 1) or the Smart-Seq2 protocol (experiment 2).
- (B) t-Distributed Stochastic Neighbor Embedding (tSNE) plot of 974 donor-derived T cells from a single subject showing four transcriptionally distinct populations of conventional CD4<sup>+</sup> and CD8<sup>+</sup> T cells.
- (C) Dot plot of key gene identifiers for the four clusters showing two clusters of CD8<sup>+</sup> T cells and two clusters of CD4<sup>+</sup> T cells, including one containing cells expressing *IL2RA* and *FOXP3*, consistent with a regulatory T cell phenotype. Dot size indicates the proportion of cells in which the gene is expressed.
- (D) tSNE plots showing the expression of key genes upregulated in CD8<sup>+</sup> population 2 (top row) or upregulated in CD8<sup>+</sup> population 1 (bottom row).
- (E) Heatmap indicating hierarchical clustering of gene expression of CD8<sup>+</sup> donor-derived T cells from population 1 and population 2. Cell labels above indicate cluster: red, population 1; green, population 2. Genes of interest are highlighted.
- (F) Dot plot showing the expression of 13 genes previously associated with tissue residency in human CD69<sup>+</sup> T cells (Kumar et al., 2017). Dot size indicates the proportion of cells in which the gene is expressed.

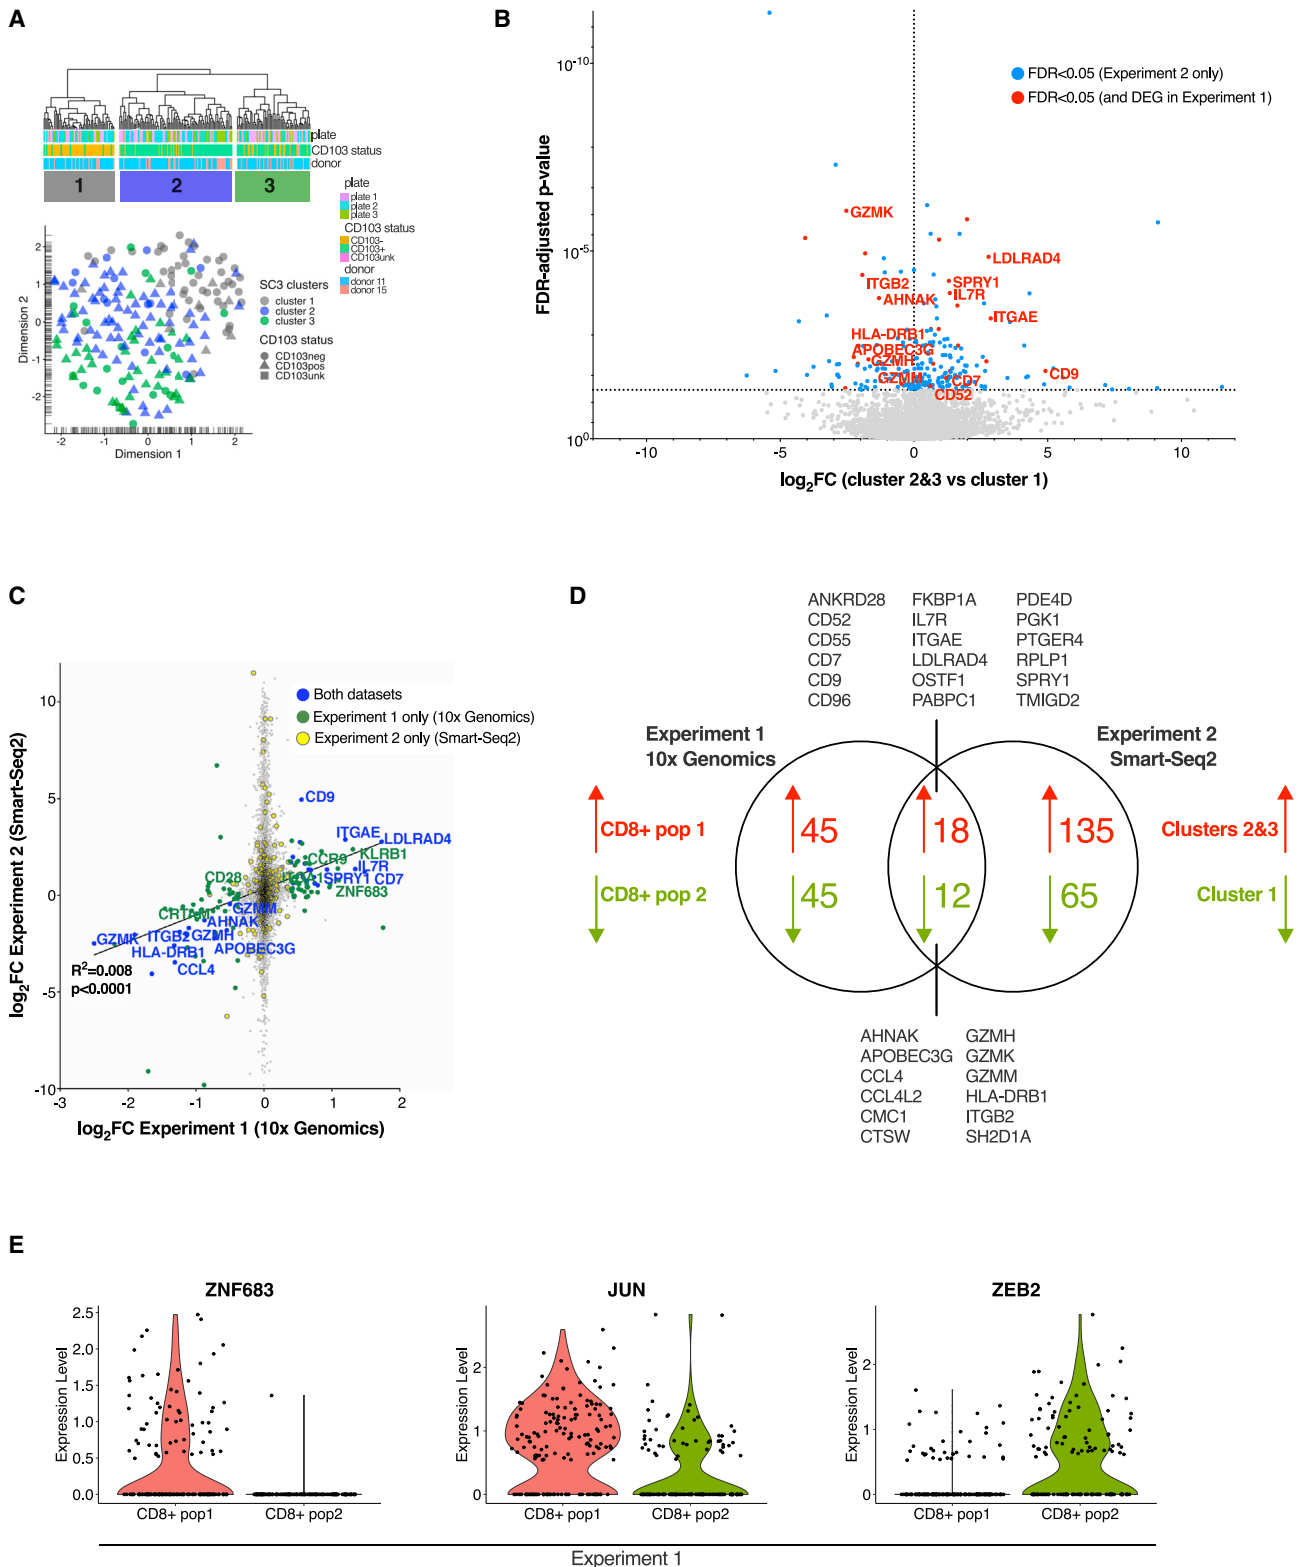

**Figure 3. Single-cell RNA sequencing identifies a core gene set distinguishing two CD8<sup>+</sup> T<sub>RM</sub> cell populations**

(A) Hierarchical clustering and Uniform Manifold Approximation and Projection in R (UMAP) plot of 196 index-sorted CD103<sup>-</sup> and CD103<sup>+</sup> CD8<sup>+</sup> donor-derived T cells from two subjects in experiment 2 identified three transcriptionally distinct clusters of conventional CD8<sup>+</sup> T cells. Cell labels below the dendrogram indicate

(legend continued on next page)

(Fagerholm et al., 2019); only one of which, *ITGAL* (CD11a), was detected in the dataset. *ITGAL* was highly expressed on the CD103<sup>-</sup> CD8<sup>+</sup> population 2 (Figures S2B and S2C).

### CD8<sup>+</sup> CD103<sup>+</sup> CD69<sup>+</sup> and CD103<sup>-</sup> CD69<sup>+</sup> ITGB2<sup>hi</sup> T<sub>RM</sub> cell subsets differ in expression of putative residency-associated genes

Transcriptional signatures associated with human tissue residency have been defined, most thoroughly by bulk RNA-seq of CD69<sup>-</sup> and CD69<sup>+</sup> T cells from multiple tissues (Kumar et al., 2017). This T<sub>RM</sub> cell gene set was explored in the two CD8<sup>+</sup> T cell populations. As expected, the genes downregulated in CD69<sup>+</sup> T cells were either not detected or were found at low levels in both clusters (Figures S2D and S2E). However, several T<sub>RM</sub> cell-associated genes upregulated in CD69<sup>+</sup> T cells were differentially expressed between the two clusters, with population 1 expressing more *ITGAE* and *ITGA1* (in agreement with work on renal T<sub>RM</sub> cells [de Leur et al., 2019]), and population 2 expressing more *CRTAM* (Figures 2D, 2F, and S2F). T cell receptor (TCR) repertoire analysis revealed the presence of shared clonotypes between the two T<sub>RM</sub> clusters (Figure S2G). These data indicate that previously identified T<sub>RM</sub> cell gene signatures may represent an amalgamation of several distinct T<sub>RM</sub> cell transcriptional states.

### scRNA-seq identifies a core gene set distinguishing two CD8<sup>+</sup> T<sub>RM</sub> cell populations

To confirm the presence of transcriptionally distinct CD8<sup>+</sup> T<sub>RM</sub> cell states, a second scRNA-seq experiment was performed on samples from two further transplant recipients (experiment 2; Figure 2A). Donor-derived CD103<sup>-</sup> and CD103<sup>+</sup> CD8<sup>+</sup> T cells were index sorted before plate-based scRNA-seq using the Smart-Seq2 protocol (Picelli et al., 2013); 267 cells were sorted and sequenced, with 196 cells remaining after filtering (Figures S2H–S2J). Three clusters were identified, with cluster 1 predominantly formed of CD103<sup>-</sup> T cells and the transcriptionally similar clusters 2 and 3 formed of CD103<sup>+</sup> T cells (Figure 3A). Clusters 2 and 3 (CD103<sup>+</sup>) expressed more *ITGAE*, *CD7*, and *IL7R*, whereas cluster 1 (CD103<sup>-</sup>) expressed more *GZMK*, *GZMH*, class II HLA molecules, and *ITGB2* (Figure 3B). *ITGAL* was also detected in cluster 1 (Figure S2K).

Differential expression analysis between cluster 1 and clusters 2 + 3 revealed congruent transcriptional differences to those in experiment 1 (Figure 3C; Tables S2 and S3). Comparison of DEGs in the two experiments identified a transcriptional signa-

ture of 30 genes that distinguished the two CD8<sup>+</sup> T<sub>RM</sub> populations (Figures 3C and 3D).

### Transcription factor expression in T<sub>RM</sub> subsets

We examined expression of transcription factors (TFs), identified from Lambert et al. (2018), in the two CD8<sup>+</sup> clusters in experiment 1. *ZNF683* (Hobit), a transcriptional regulator of residency in mice (Mackay et al., 2016), but which was not linked with a human T<sub>RM</sub>-associated gene set (Kumar et al., 2017), was more highly expressed in population 1 (Figure 3E). Population 1 also showed greater expression of *JUN*, whereas population 2 expressed more *ZEB2*, a TF associated with terminally differentiated effector CD8<sup>+</sup> T cell populations (Omlusik et al., 2015). Other TFs previously associated with tissue residency were not differentially expressed between the CD8<sup>+</sup> T<sub>RM</sub> cell populations, although *PRDM1* and *BHLHE40* showed increased expression in the CD4<sup>+</sup> T<sub>conv</sub> T<sub>RM</sub> cluster (Figure S3A). TF regulons (gene sets predicted to be regulated by a particular TF [Aibar et al., 2017; Van de Sande et al., 2020]) showed distinct patterns between clusters (Figure S3B; Table S4). As expected, the FOXP3 regulon was strongly associated with the T<sub>reg</sub> cluster (Figures S3B and S3C). Both RUNX3 and NR4A1 regulons showed enhanced activity in both CD8<sup>+</sup> T<sub>RM</sub> cell clusters; these two TFs have previously been linked with residency in murine studies (Boddupalli et al., 2016; Milner et al., 2017). The module of E2F3, a TF associated with proliferative capacity, showed enhanced activity in CD8<sup>+</sup> population 2, whereas PRDM1 and BHLHE40 regulons were associated with CD4<sup>+</sup> T<sub>conv</sub> T<sub>RM</sub> cells, consistent with the increased expression of these TFs in those cells.

### CD8<sup>+</sup> T<sub>RM</sub> cell gene sets show differential expression in human and murine CD8<sup>+</sup> intestinal T cell populations from published datasets

We sought to confirm whether these two transcriptionally distinct T<sub>RM</sub> populations were seen outside the transplant setting. First, we examined the expression of our transcriptional signature distinguishing CD8<sup>+</sup> T<sub>RM</sub> cell populations in published scRNA-seq data from the human colon (Corridoni et al., 2020). Unsupervised hierarchical clustering of conventional memory T cell populations identified by the authors (using all DEGs) broadly divided the clusters into two groups (Figure S4A). The same clustering approach, using only our 30-gene T<sub>RM</sub> cell subset transcriptional signature (Figure 3D), largely reproduced the same clustering and identified distinct populations that broadly

the sorting plate, the subject, and CD103 expression determined by index sorting. For UMAP plot: circles, CD103<sup>-</sup> cells by index sorting; triangles, CD103<sup>+</sup> cells by index sorting; square, unknown CD103 expression (n = 1 cell) by index sorting.

(B) Volcano plot of differential gene expression between cluster 1 and clusters 2 + 3 identified in experiment 2, with genes upregulated (right) or downregulated (left) in clusters 2 + 3 compared with cluster 1. Log<sub>2</sub> fold change is plotted against the false discover rate (FDR)-adjusted p-value, with horizontal dotted line at FDR = 0.05. Differentially expressed genes are marked in blue, with those differentially expressed in both experiments 1 and 2 marked in red.

(C) Correlation of log<sub>2</sub> fold change in CD8<sup>+</sup> population 1 versus 2 in experiment 1 (10× Genomics, x axis) and clusters 2 + 3 versus cluster 1 in experiment 2 (Smart-Seq2, y axis). Blue, genes differentially expressed in both experiments; green, genes differentially expressed in experiment 1 only; yellow, genes differentially expressed in experiment 2 only; gray, genes not differentially expressed.

(D) Venn diagram showing differentially expressed genes upregulated in clusters 2 + 3 (experiment 2)/CD8<sup>+</sup> population 1 (experiment 1) (red) versus genes upregulated in cluster 1 (experiment 2)/CD8<sup>+</sup> population 2 (experiment 1) (green). A core gene set of 30 genes that differentiated the two populations in both experiments is listed.

(E) Violin plots showing expression of transcription factors *ZNF683*, *JUN*, and *ZEB2*, which showed differential expression between CD8<sup>+</sup> T<sub>RM</sub> cell populations in experiment 1.



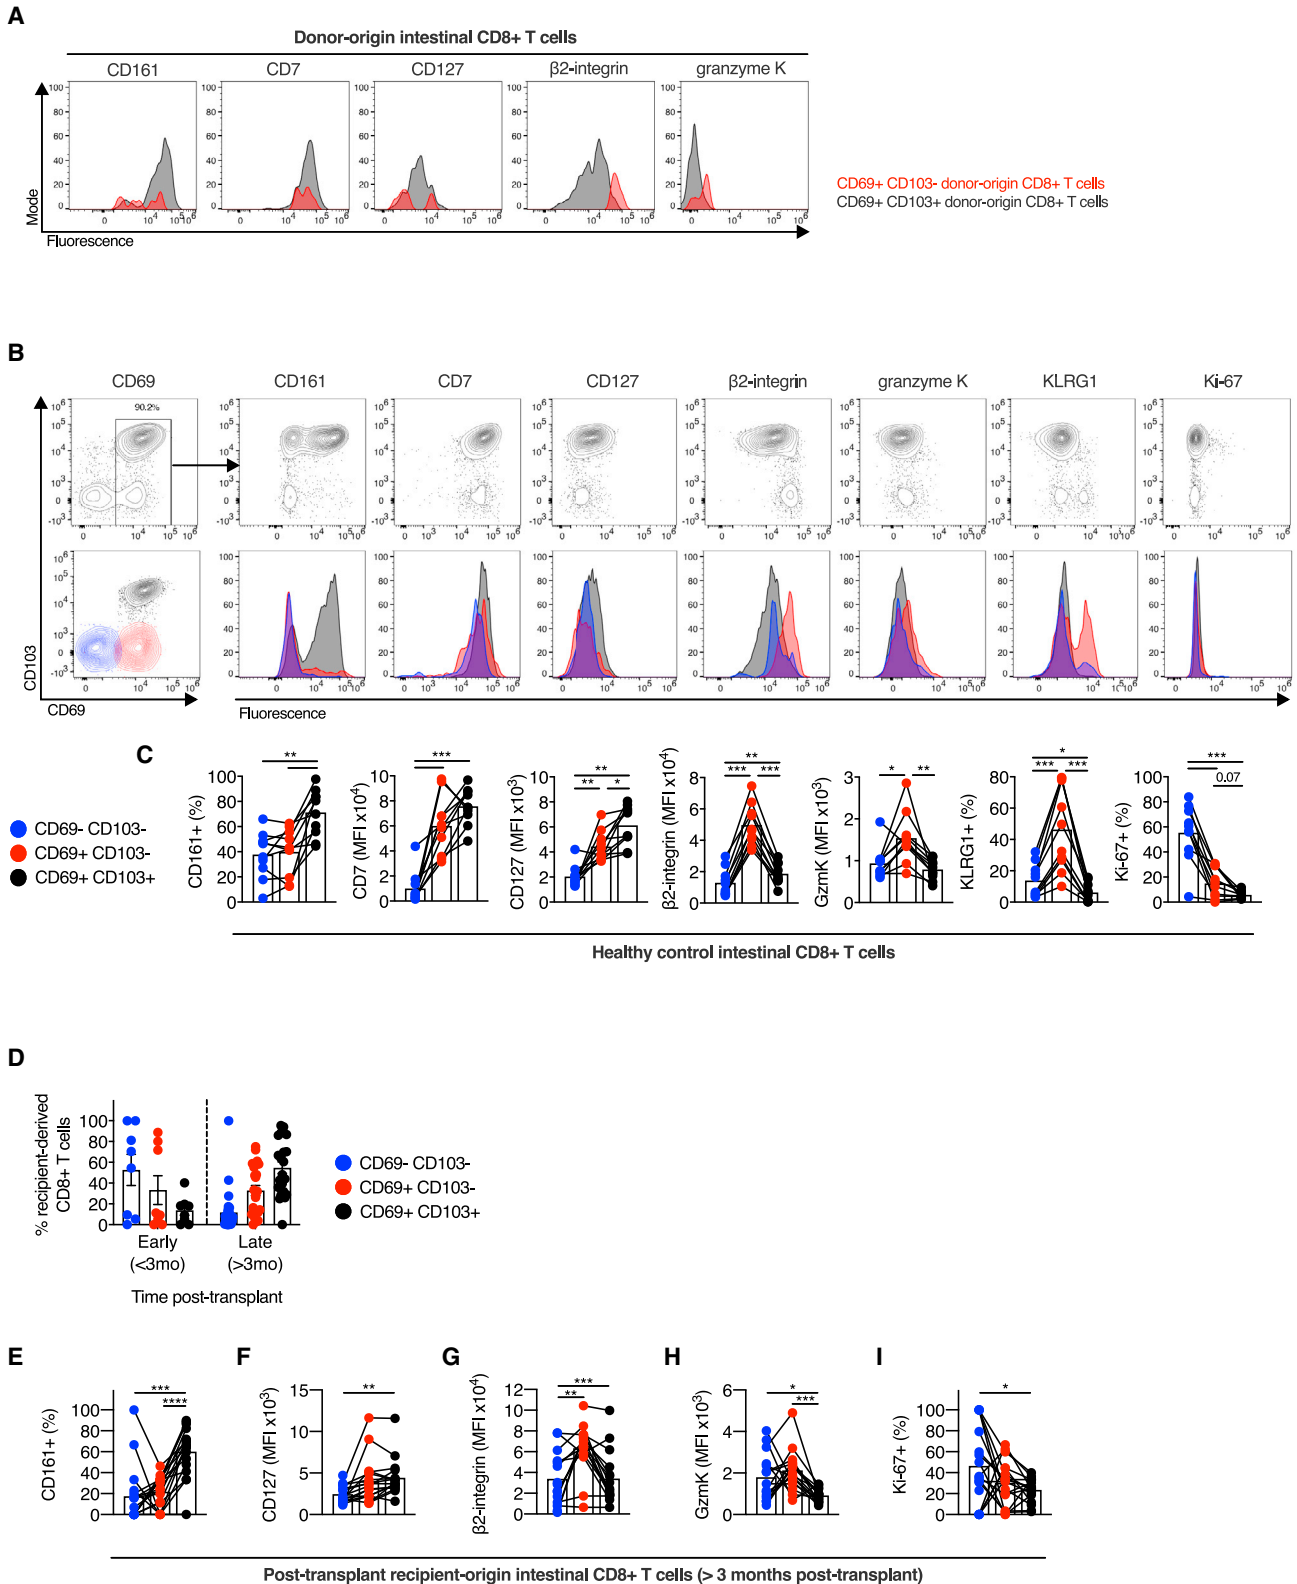

**Figure 4. CD103<sup>+</sup> and CD103<sup>-</sup> CD8<sup>+</sup> T cells display distinct phenotypes in healthy and transplanted intestine**

(A) Representative expression of CD161, CD7, CD127 (IL7R),  $\beta$ 2-integrin (ITGB2), and granzyme K on CD103<sup>-</sup> (red) and CD103<sup>+</sup> (black) donor-derived T cells from the intestinal transplant graft.

(legend continued on next page)

aligned with our CD8<sup>+</sup> population 1 (T<sub>RM</sub>, intraepithelial lymphocytes [IELs], IL26<sup>+</sup>, and memory) and population 2 (FGFBP2<sup>+</sup>, GZMK<sup>+</sup> (1), and GZMK<sup>+</sup> (2)) (Figure S4B). We then examined the expression of the T<sub>RM</sub> cell subset transcriptional signature in three CD8A<sup>+</sup>/CD8B<sup>+</sup> T cell clusters in published scRNA-seq data from the human ileum (Martin et al., 2019). Hierarchical clustering split genes into those associated with the two populations, with two ileal CD8<sup>+</sup> clusters (4 and 47) showing similarities to CD8<sup>+</sup> population 1 and cluster 21 showing similarities to CD8<sup>+</sup> population 2 (Figure S4C).

Recent murine work has described transcriptionally distinct subsets of intestinal CD8<sup>+</sup> T<sub>RM</sub> cells in the lymphocytic choriomeningitis virus (LCMV) model of tissue residency, which highlighted CD28 as a possible marker for these subsets (Kurd et al., 2020). CD28 was increased in CD8<sup>+</sup> population 2 in experiment 1, although that difference was not replicated in experiment 2 (data not shown). We examined the expression of murine orthologs of the population 2 signature in the published data. Population 2-associated genes were significantly enriched in one of the clusters at both the day 60 and 90 time points after LCMV infection, providing evidence of analogous T<sub>RM</sub> cell subsets in the human and mouse intestine (Figure S4D). In sum, the CD8<sup>+</sup> T<sub>RM</sub> cell transcriptional signatures identified in the current study can be validated in distinct intestinal CD8<sup>+</sup> T cell populations from mice and humans.

### CD103<sup>+</sup> and CD103<sup>-</sup> CD8<sup>+</sup> T cells display distinct phenotypes in the healthy intestine

Flow cytometry of donor-derived T cells demonstrated differences in the expression of CD161, β2-integrin, and granzyme K between CD103<sup>-</sup> and CD103<sup>+</sup> CD8<sup>+</sup> T cells, consistent with our scRNA-seq data (Figure 4A). To validate the phenotypic differences between the two putative SI CD8<sup>+</sup> T<sub>RM</sub> cell subsets outside the transplant setting, we performed flow cytometry of SI T cells from healthy donors. CD8<sup>+</sup> SI T cells expressing both CD69 and CD103 predominated, representing 88.9% (range, 81.7%–96.0%) of CD8<sup>+</sup> T cells, with no difference observed dependent on SI location (Figure S5A).

We examined the protein expression of key markers that were differentially expressed between the two T<sub>RM</sub> cell clusters in our scRNA-seq datasets. CD103<sup>+</sup> CD8<sup>+</sup> T cells expressed more CD161 and CD127 (IL-7R) compared with the CD69<sup>-</sup> or CD69<sup>+</sup>CD103<sup>-</sup> cells, consistent with the transcriptomic data (Figures 4B and 4C). CD7 expression was greater on all CD69<sup>+</sup>

T cells, with no difference between CD69<sup>+</sup>CD103<sup>-</sup> and CD69<sup>+</sup>CD103<sup>+</sup> populations. In contrast, CD69<sup>+</sup>CD103<sup>-</sup> CD8<sup>+</sup> T cells expressed higher levels of β2-integrin, granzyme K, and KLRG1 than either CD69<sup>-</sup> cells or CD69<sup>+</sup>CD103<sup>+</sup> cells.

Ki-67 expression formed a gradient between the three populations, with greater expression in the CD69<sup>-</sup> population, and a trend toward increased Ki-67 expression in CD69<sup>+</sup>CD103<sup>-</sup> CD8<sup>+</sup> T cells compared with CD69<sup>+</sup>CD103<sup>+</sup> CD8<sup>+</sup> T cells (mean, 14.88% versus 5.72%, one-way ANOVA with Tukey's multiple-comparison test, *p* = 0.067). This is consistent with prior work indicating that T<sub>RM</sub> cell persistence is due to longevity, rather than to *in situ* proliferation (Thome et al., 2014).

### Graft-infiltrating, recipient-derived T cells take on a T<sub>RM</sub> cell phenotype over time, with CD103<sup>+</sup> and CD103<sup>-</sup> CD8<sup>+</sup> T cells displaying distinct phenotypes

To explore the dynamics of T<sub>RM</sub> cell phenotype acquisition, we examined graft-infiltrating, recipient-derived T cells. In the early post-transplant period, 52.7% of infiltrating CD8<sup>+</sup> T cells lacked CD69 expression, with acquisition of the CD69<sup>+</sup>CD103<sup>+</sup> T<sub>RM</sub> cell phenotype over time (Figure 4D). At later times post-transplant, CD103<sup>-</sup> and CD103<sup>+</sup> populations clearly differed in phenotype, consistent with the two subsets observed in the healthy SI. CD161 expression was greater on CD69<sup>+</sup>CD103<sup>+</sup> CD8<sup>+</sup> T cells than CD69<sup>+</sup>CD103<sup>-</sup> CD8<sup>+</sup> T cells, and granzyme K expression was greater on CD69<sup>+</sup>CD103<sup>-</sup> CD8<sup>+</sup> T cells (Figures 4E–4I). Graft-infiltrating CD69<sup>+</sup>CD103<sup>-</sup> CD8<sup>+</sup> T cells demonstrated higher expression of β2-integrin than either CD69<sup>-</sup> or CD69<sup>+</sup>CD103<sup>+</sup> populations (Figure 4G), while CD69<sup>+</sup> populations showed higher Ki-67 expression as before (Figure 4I). Recipient-derived CD8<sup>+</sup> T cells infiltrating the graft in the early post-transplant period displayed some analogous patterns of expression, including of β2-integrin, although the small number of samples precluded further analysis (Figure S5B).

### CD103<sup>+</sup> and CD103<sup>-</sup> CD8<sup>+</sup> T cells maintain their distinct phenotypes in lamina propria and intra-epithelial compartments

We examined the localization of these identified populations within the intestinal mucosa. The presence of CD103<sup>-</sup> and CD103<sup>+</sup> donor-derived CD8<sup>+</sup> T cells in the transplanted SI mucosa was confirmed using chip cytometry (Figures 5A and S5C). Intestinal mucosa CD8<sup>+</sup> T cells, both IELs and lamina propria lymphocytes (LPLs), had a predominantly effector memory

(B and C) Phenotypic analysis of CD8<sup>+</sup> T cell populations in healthy small intestine.

(B) Representative flow cytometry plots and histograms of CD8<sup>+</sup> T cell phenotype from spectral flow cytometry, with expression of the following markers plotted against CD103: CD69, CD161, CD7, CD127, β2-integrin, granzyme K, KLRG1, and Ki-67. Blue, CD69<sup>-</sup>CD103<sup>-</sup> cells; red, CD69<sup>+</sup>CD103<sup>-</sup> cells; black, CD69<sup>+</sup>CD103<sup>+</sup> cells.

(C) Proportion of positive cells (CD161, KLRG1, and Ki-67) or MFI (CD7, CD127, β2-integrin, and granzyme K) of CD8<sup>+</sup> T cells, categorized by CD69 and CD103 expression, in small intestinal biopsies from healthy control subjects (*n* = 10). Mean percentage or MFI represented by bars. Connecting lines represent populations from the same subject.

(D–I) Phenotypic analysis of recipient-derived CD8<sup>+</sup> T cell populations infiltrating the intestinal transplant graft.

(D) The proportion of recipient-derived CD8<sup>+</sup> T cells co-expressing CD69 and CD103 in intestinal transplant grafts, categorized by time after transplant (*n* = 35; 16 subjects).

(E–I) Proportion of CD161<sup>+</sup> cells (E), MFI of CD127 (F), β2-integrin (G), and granzyme K (H), or proportion of Ki-67<sup>+</sup> cells (I) of recipient-derived CD8<sup>+</sup> T cells, categorized by CD69 and CD103 expression and time after transplant in intestinal transplant grafts (*n* = 23; 12 subjects). Mean percentage or MFI represented by bars. Black lines connect populations from the same subject.

Statistical analysis performed with one-way ANOVA with Tukey's multiple-comparison test. \**p* ≤ 0.05, \*\**p* ≤ 0.01, \*\*\**p* ≤ 0.001, \*\*\*\**p* ≤ 0.0001.

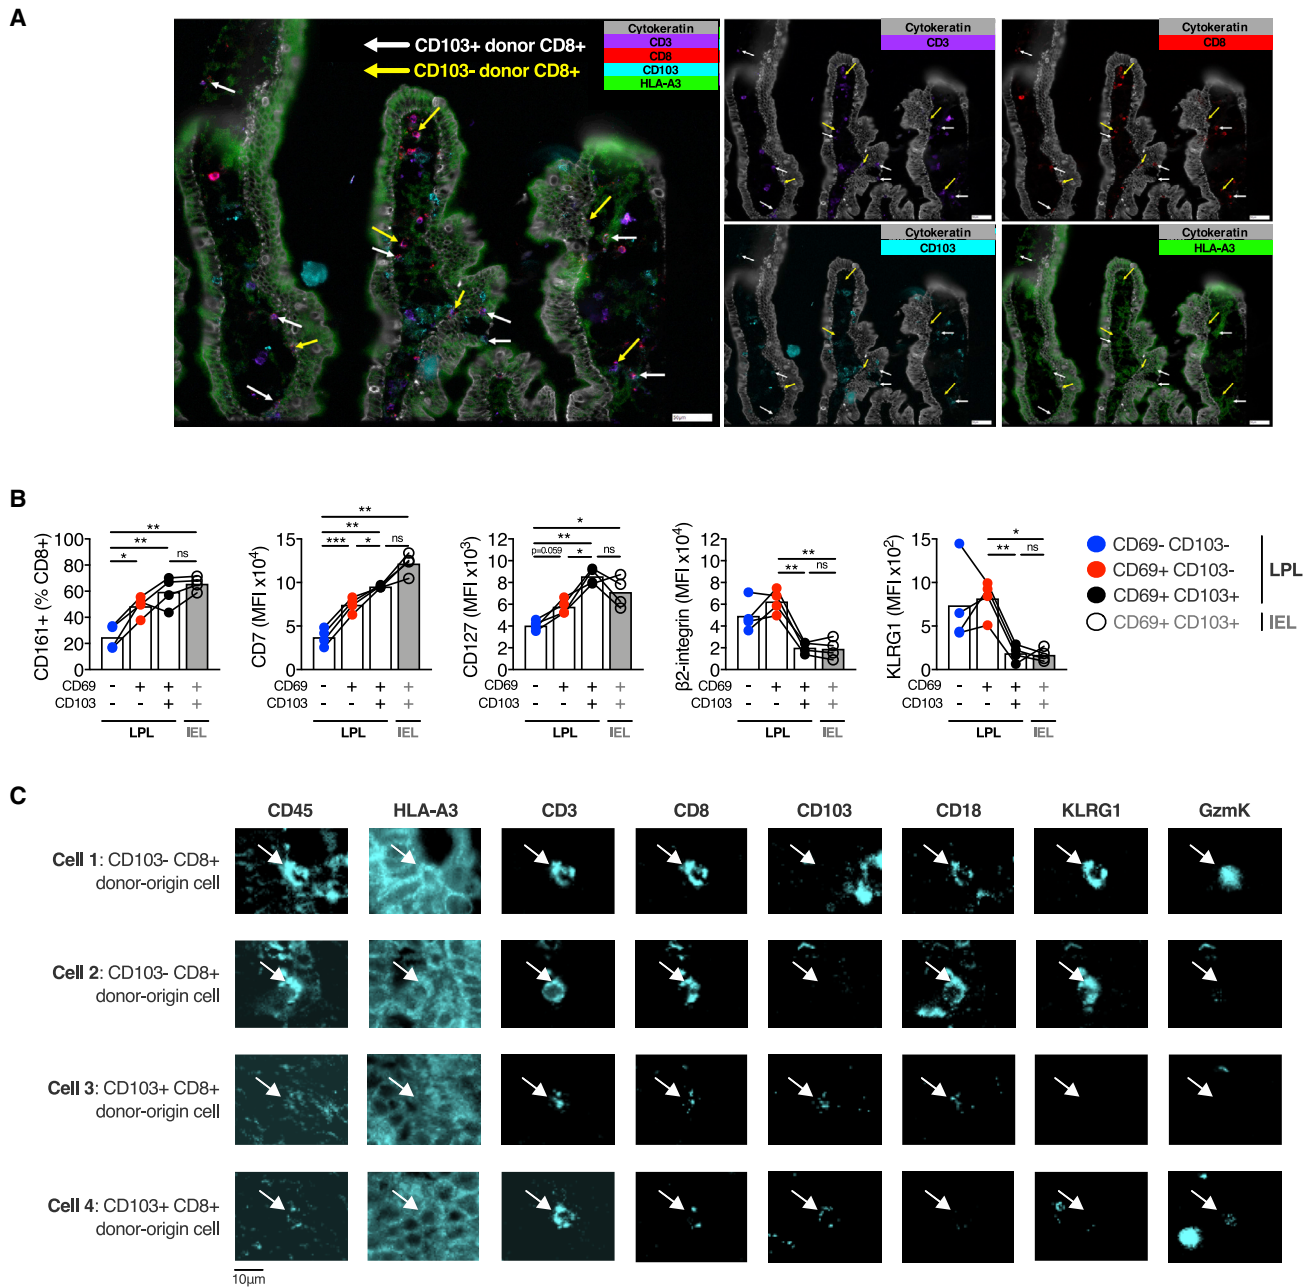

**Figure 5. Graft-infiltrating, recipient-derived T cells take on a  $T_{RM}$  cell phenotype over time, with  $CD103^+$  and  $CD103^-$   $CD8^+$  T cells displaying distinct phenotypes**

(A) Fluorescence microscopy chip cytometry image of small intestinal transplant mucosa from a single subject 3 months after transplant. The donor was HLA-A3<sup>+</sup>, and the recipient was HLA-A3<sup>-</sup>. False-color fluorescence imaging for cytokeratin (gray), CD3 (purple), CD8 (red), CD103 (blue), and HLA-A3 (green). Donor-derived  $CD8^+$   $CD103^+$  and  $CD103^-$  T cells are indicated by white and yellow arrows, respectively.

(B) Phenotypic analysis of  $CD8^+$  T cell populations in healthy small intestinal epithelium and lamina propria. Proportion of positive cells (CD161) or MFI (CD7, CD127,  $\beta$ 2-integrin, and KLRG1) of intraepithelial lymphocyte (IEL) or lamina propria lymphocyte (LPL)  $CD8^+$  T cells, categorized by CD69 and CD103 expression, in small intestinal biopsies from healthy control subjects ( $n = 4$ ). Mean percentage or MFI represented by bars. Connecting lines represent populations from the same subject.

(C) Fluorescence microscopy chip cytometry of representative  $CD103^-$  (cells 1 and 2) and  $CD103^+$  (cells 3 and 4) donor-derived  $CD8^+$  T cells, showing the expression of CD18 ( $\beta$ 2-integrin), KLRG1, and granzyme K.

Statistical analysis performed with one-way ANOVA with Tukey's multiple-comparison test. \* $p \leq 0.05$ , \*\* $p \leq 0.01$ , \*\*\* $p \leq 0.001$ , \*\*\*\* $p \leq 0.0001$ .

( $T_{EM}$ ) phenotype (Figures S5D and S5E), with  $CD8^+$  IELs dominated by  $CD103^+$  populations, consistent with prior work (Figures S5C and S5F) (Bartolomé-Casado et al., 2019).  $\beta 2$ -integrin expression was constitutively high on all circulating memory T cells with greatest expression on  $T_{EM} CD8^+$  T cells (Figure S5F), as expected, because of the involvement of LFA-1 in tissue entry via ICAM-1 (Fagerholm et al., 2019).

The single-cell transcriptional data indicated that  $CD8^+$   $CD69^+CD103^+$  T cells from the intestinal mucosa formed a single transcriptional cluster; however, previous work has divided  $CD8^+$   $CD103^+$  T cells into two populations based on their location in the epithelium or LPL (Bartolomé-Casado et al., 2019). We examined the phenotype of  $CD8^+$   $CD103^+$  T cells in the IEL and LPL compartments in the healthy SI. Phenotypic differences between  $CD8^+$   $CD103^-$  and  $CD103^+$  T cells were again observed in the LPL T cells, with greater expression of  $\beta 2$ -integrin and KLRG1 on  $CD103^-$  cells and greater expression of CD161, CD7, and CD127 on  $CD103^+$  cells (Figure 5B). Chip cytometry of CD18, KLRG1, and granzyme K expression by  $CD103^-$  and  $CD103^+$   $CD8^+$   $T_{RM}$  cells *in situ* showed congruent expression to flow cytometry results (Figure 5C). The  $CD8^+$   $CD103^+$  T cell populations in the IEL and LPL compartments showed comparable expression of  $\beta 2$ -integrin, KLRG1, CD161, CD7, and CD127 to each other, bolstering the evidence that these populations are both transcriptionally and phenotypically similar, rather than representing distinct subsets (Figure 5B).

### CD103<sup>+</sup> CD8<sup>+</sup> intestinal T cells demonstrate greater capacity for cytokine production

To assess the cytokine production capacity of these subsets, SI T cells from healthy controls were stimulated for 4 h with phorbol 12-myristate 13-acetate (PMA) and ionomycin, before intracellular flow cytometry for tumor necrosis factor alpha (TNF- $\alpha$ ), interferon gamma (IFN- $\gamma$ ), IL-2, CCL4, IL-17A, and IL-10; 77% of  $CD69^+CD103^+$   $CD8^+$  T cells produced at least one cytokine, a greater proportion than  $CD69^+CD103^-$   $CD8^+$  T cells (47.7% cytokine positive,  $p < 0.001$ ) and  $CD69^-$   $CD8^+$  T cells (37% cytokine positive,  $p < 0.001$ ) produced (Figures 6A–6F).  $CD69^+$  populations produced more TNF- $\alpha$  and IFN- $\gamma$  than  $CD69^-$  cells, irrespective of CD103 expression (Figures 6A and 6B). Although scRNA-seq data indicated increased CCL4 transcripts in  $CD69^+CD103^-$   $CD8^+$  T cells, CCL4 production after stimulation was not different between the two  $CD69^+$  populations (Figure 6C).  $CD69^+CD103^+$   $CD8^+$  T cells expressed more IL-2 than either  $CD69^+CD103^-$  or  $CD69^-$  populations (Figure 6D), consistent with a prior study of hepatic  $CD103^+$   $CD8^+$   $T_{RM}$  cells (Pallett et al., 2017).

There was a spectrum of functionality between the three populations, with  $CD69^-$   $CD8^+$  T cells predominantly non- or mono-functional,  $CD69^+CD103^+$   $CD8^+$  T cells predominantly polyfunctional, and  $CD69^+CD103^-$   $CD8^+$  T cells showing intermediate functionality (Figures 6E and 6F), consistent with a prior report (Bartolomé-Casado et al., 2019). Quadruple functional cells were more common in the  $CD69^+CD103^+$  population than in the  $CD69^+CD103^-$  population (21.76% versus 10.32%,  $p < 0.0001$ ) and were near absent in the  $CD69^-$  population (0.38%). These results demonstrate that the transcriptionally distinct  $CD103^-$  and  $CD103^+$   $CD8^+$   $T_{RM}$  cell populations differ

functionally and phenotypically, with  $CD103^+$   $CD8^+$  populations more polyfunctional and producing IL-2.

### CD103<sup>-</sup> and CD103<sup>+</sup> CD4<sup>+</sup> T cells display analogous phenotypic and functional differences to their CD8<sup>+</sup> counterparts

Despite not forming transcriptionally distinct clusters by scRNA-seq,  $CD4^+$  SI T cells differed in their phenotype, dependent on CD69 and CD103 expression.  $CD69^-$  populations expressed lower levels of CD161 and CD127, whereas  $CD69^+CD103^-$   $CD4^+$  T cells had more  $\beta 2$ -integrin than either  $CD69^-$  or  $CD69^+CD103^+$  populations had, analogous to their  $CD8^+$  counterparts (Figure 7A). Differences in the expression of CD7, KLRG1, and granzyme K between  $CD69^+CD103^-$  and  $CD69^+CD103^+$   $CD8^+$  populations were not seen within the  $CD4^+$  populations. Recipient-derived, graft-infiltrating  $CD69^+CD103^-$   $CD4^+$  T cells also displayed more  $\beta 2$ -integrin than their  $CD103^+$  counterparts did (mean fluorescence intensity [MFI], 51,753 versus 30,959,  $p < 0.0001$ ; Figure 7B).

A donor-derived regulatory  $CD4^+$  FOXP3<sup>+</sup> T cell population was detected in the scRNA-seq data (Figure 2C), and donor-derived  $CD25^+CD127^-$   $CD4^+$  T cells were detected by flow cytometry in some subjects, consistent with potential long-term residency of SI  $CD4^+$  regulatory T cells (Figure S5H). Low cell numbers of this population precluded further analysis.

$CD69^+$   $CD4^+$  SI T cells were potent cytokine producers, as seen previously (Bartolomé-Casado et al., 2020) and demonstrated greater production of multiple cytokines upon short-term stimulation compared with  $CD69^-$   $CD4^+$  T cells (Figures 7C–7I). In particular, IL-17A production was almost exclusively restricted to  $CD69^+$  T cells (Figure 7C).  $CD69^+CD103^+$   $CD4^+$  T cells demonstrated greater production of TNF- $\alpha$ , CCL4, IL-17A, and IL-10 than their  $CD69^+CD103^-$  counterparts. There was a gradient of functionality between the three  $CD4^+$  populations, with  $CD103^+$  cells showing the greatest polyfunctional cytokine production (Figure 7I), as seen in  $CD8^+$  T cells. In summary,  $CD4^+$  SI T cell populations demonstrated analogous differences in phenotype and functionality to their  $CD8^+$  counterparts.

## DISCUSSION

This study has identified two transcriptionally distinct states of functionally resident bona fide human intestinal  $CD8^+$   $T_{RM}$  cells, which differ in phenotype and cytokine production. This was demonstrated using the rigorous approach of identifying donor-derived populations in the intestinal graft after transplant, which confirms functional tissue residency, and replicated in the healthy gut. The  $CD8^+$   $T_{RM}$  cell subsets differ in the expression of several genes previously associated with human  $T_{RM}$  cells, which suggests that these signatures, derived from bulk RNA-seq data, may represent an amalgamation of transcriptionally distinct  $T_{RM}$  cell subsets (Kumar et al., 2017). Moreover, several TFs previously associated with residency programs were differentially expressed in intestinal  $T_{RM}$  cell clusters, suggesting potential mechanisms for the regulation of transcriptional heterogeneity.

The phenotypic differences between  $CD8^+$  T cell subsets were replicated within graft-infiltrating T cell populations, which are

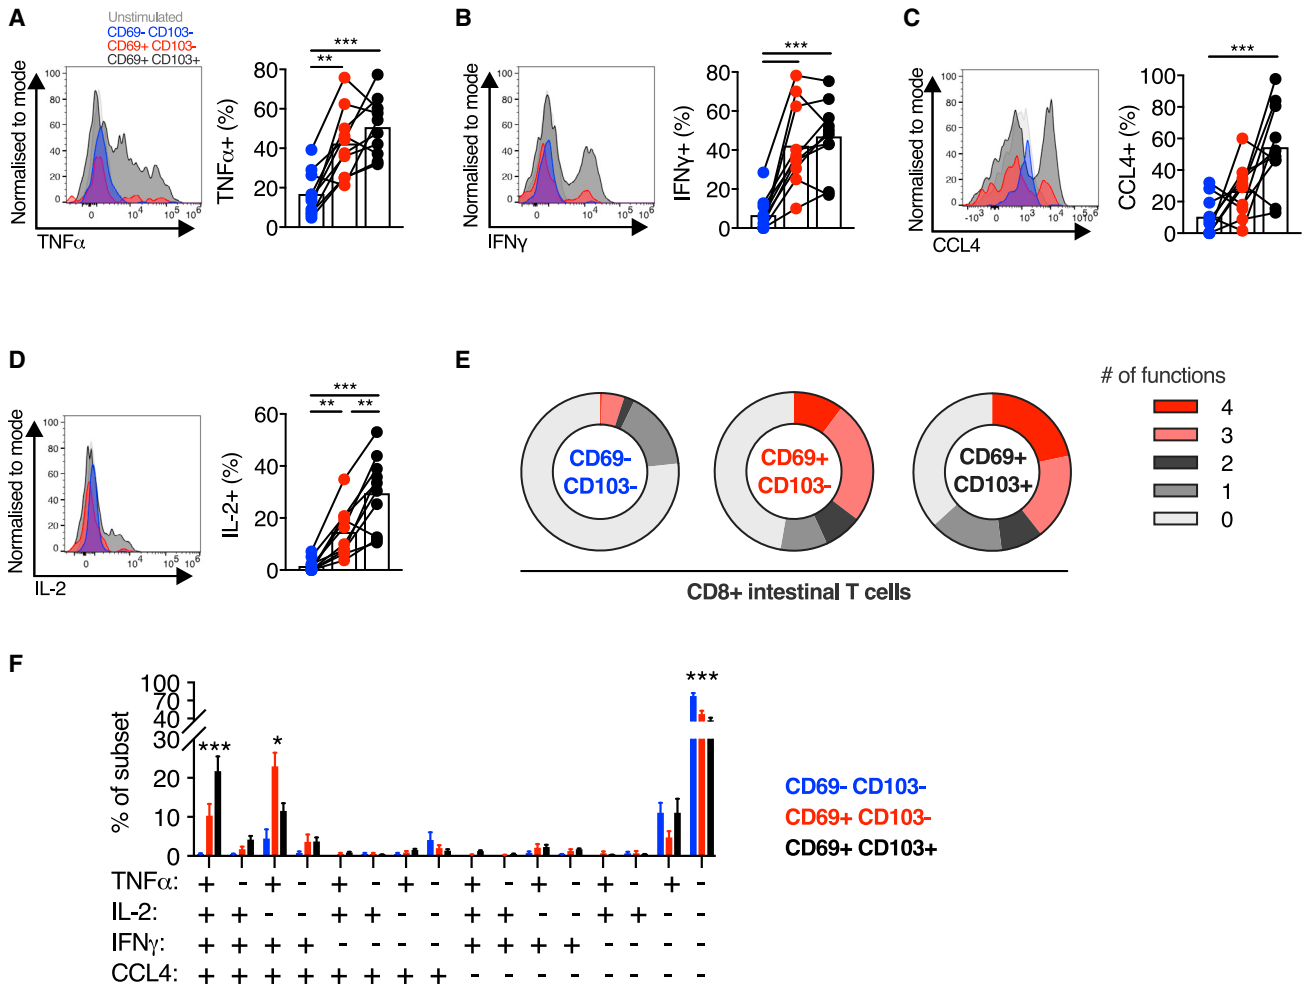

**Figure 6. CD103<sup>+</sup> CD8<sup>+</sup> intestinal T cells demonstrate greater capacity for cytokine production**

(A–D) Cytokine production by small intestinal CD8<sup>+</sup> T cells. Representative histograms of expression, and group summaries of proportion of CD8<sup>+</sup> T cells expressing TNF- $\alpha$  (A), IFN- $\gamma$  (B), CCL4 (C), and IL-2 (D) after 4 h stimulation with PMA and ionomycin in the presence of brefeldin A and monensin, categorized by CD69 and CD103 expression, in small intestinal biopsies from healthy control subjects (n = 10).

(E) Mean proportion of CD8<sup>+</sup> T cells expressing 0, 1, 2, 3, or 4 of the cytokines/chemokines TNF- $\alpha$ , IFN- $\gamma$ , CCL4, and IL-2, categorized by CD69 and CD103 co-expression, from small intestinal biopsies from healthy control subjects (n = 10).

(F) Mean percentage ( $\pm$  SEM) of CD8<sup>+</sup> T cells co-expressing TNF- $\alpha$ , IFN- $\gamma$ , CCL4, and/or IL-2 after PMA and ionomycin stimulation as described, categorized by CD69 and CD103 expression.

Statistical analysis performed with one-way ANOVA with Tukey's multiple-comparison test. \*p  $\leq$  0.05, \*\*p  $\leq$  0.01, \*\*\*p  $\leq$  0.001.

assumed to be establishing residency *de novo*. Although lateral migration of T<sub>RM</sub> cells from recipient-derived intestinal tissue is a potential confounding mechanism, most intestinal transplant recipients have little or no remaining intestinal tissue after transplant, whereas murine work has demonstrated the limited motility of CD8<sup>+</sup> T<sub>RM</sub> cells in tissue (Thompson et al., 2019). Human studies of the development of residency over time and the clonal relatedness of T<sub>RM</sub> cell subsets are a priority for future work.

$\alpha$ E-integrin is expressed on CD8<sup>+</sup> T cells within both the IELs and a subset of LPLs, with previous work considering these to be distinct subsets (Bartolomé-Casado et al., 2019). However, the presence of only a single transcriptionally distinct

CD69<sup>+</sup>CD103<sup>+</sup> cluster, along with the phenotypic similarity between CD103<sup>+</sup> IELs and LPLs, suggests that these represent a single subset within two spatially distinct compartments of the mucosa. Similarly, KLRG1 has been proposed as a marker for a distinct subset of CD103<sup>-</sup> CD8<sup>+</sup> T cells in the LPL (Bartolomé-Casado et al., 2019). However, the lack of sub-clusters within the CD69<sup>+</sup>CD103<sup>-</sup> CD8<sup>+</sup> T cell population in the single-cell data fails to support the conclusion that this is a transcriptionally distinct population.

The CD69<sup>+</sup>CD103<sup>-</sup> CD8<sup>+</sup> T<sub>RM</sub> population, although definitively resident, as demonstrated by persistence after transplantation, is found at lower frequencies with time after transplant, making up a small proportion of T cells in the mucosa after 1 year

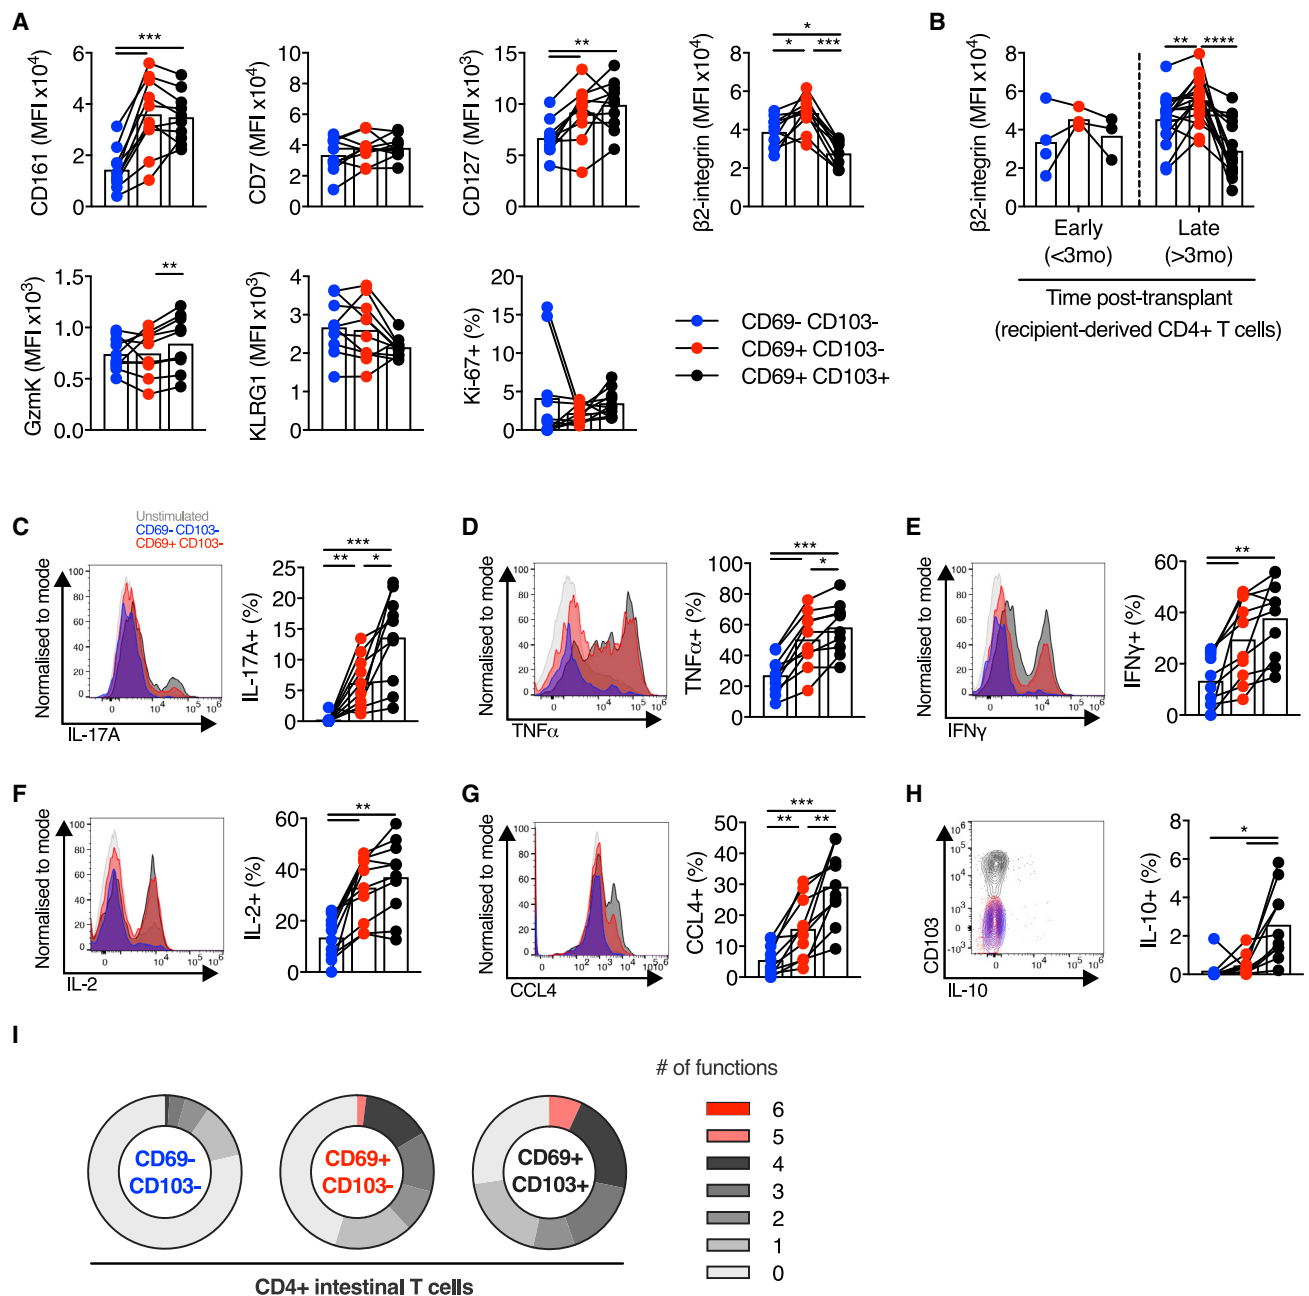

**Figure 7. CD103<sup>+</sup> and CD103<sup>-</sup> CD4<sup>+</sup> T cells display analogous phenotypic and functional differences to their CD8<sup>+</sup> counterparts**

(A) MFI (CD161, CD7, CD127,  $\beta$ 2-integrin, granzyme K, and KLRG1) or percentage positive (Ki-67) of CD4<sup>+</sup> T cells, categorized by CD69 and CD103 expression, in small intestinal biopsies from healthy control subjects (n = 10). MFI represented by bars. Connecting lines represent populations from the same subject. Blue, CD69<sup>-</sup>CD103<sup>-</sup> cells; red, CD69<sup>+</sup>CD103<sup>-</sup> cells; black, CD69<sup>+</sup>CD103<sup>+</sup> cells.

(B) MFI of  $\beta$ 2-integrin on recipient-derived CD4<sup>+</sup> T cells, categorized by CD69 and CD103 expression and time after transplant, in intestinal transplant grafts (n = 21; 12 subjects). MFI represented by bars.

(C–H) Cytokine production by small intestinal CD4<sup>+</sup> T cells. Representative histograms of expression, and group summaries of proportion of CD4<sup>+</sup> T cells expressing IL-17A (C), TNF- $\alpha$  (D), IFN- $\gamma$  (E), IL-2 (F), CCL4 (G), and IL-10 (H) after 4 h stimulation with PMA and ionomycin in the presence of brefeldin A and monensin, categorized by CD69 and CD103 expression, in small intestinal biopsies from healthy control subjects (n = 10).

(I) Mean proportion of CD4<sup>+</sup> T cells expressing 0, 1, 2, 3, 4, 5, or 6 of the cytokines or chemokines IL-17A, TNF- $\alpha$ , IFN- $\gamma$ , CCL4, IL-2, and IL-10, categorized by CD69 and CD103 co-expression, from small intestinal biopsies from healthy control subjects (n = 10).

Statistical analysis performed with one-way ANOVA with Tukey's multiple-comparison test. \*p  $\leq$  0.05, \*\*p  $\leq$  0.01, \*\*\*p  $\leq$  0.001.

post-transplant. This may be because the CD103<sup>-</sup> population represents an intermediate state on the path to the CD103<sup>+</sup> population or may be due to increased capacity for longevity and persistence in the CD103<sup>+</sup> T<sub>RM</sub> cell population. The two CD8<sup>+</sup> T<sub>RM</sub> cell populations do differ in IL-7R (CD127) expression, and in IL-2 production, which may indicate differing persistence and proliferative properties. Autocrine IL-2 production is critical to secondary proliferative responses and IFN- $\gamma$  production in CD8<sup>+</sup> T cells (Feau et al., 2011) and may be of particular relevance to IEL populations in which the infrequent CD4<sup>+</sup> T cells may provide suboptimal help (Zimmerli et al., 2005).

In addition, the two CD8<sup>+</sup> T<sub>RM</sub> cell populations differ in the expression of chemokine receptors and integrins, indicating potential differences in tissue homing and retention. Of particular interest,  $\beta$ 2-integrin is highly expressed on CD69<sup>+</sup>CD103<sup>-</sup> T<sub>RM</sub> cells, a population that remains difficult to positively distinguish from recent immigrants from the circulation, particularly in the context of inflammation, in which CD69 expression may represent cellular activation rather than residency. Despite constitutively high expression on peripheral CD8<sup>+</sup> T<sub>EM</sub> cells,  $\beta$ 2-integrin expression is low on CD69<sup>-</sup> T cells in intestinal tissue, suggesting that  $\beta$ 2-integrin surface expression is reduced on recent tissue immigrants, before subsequent upregulation on CD69<sup>+</sup>CD103<sup>-</sup> T<sub>RM</sub> cells.  $\beta$ 2-integrin, in combination with CD69 expression, could therefore represent an additional positive marker to identify the CD103<sup>-</sup> T<sub>RM</sub> cell population.

$\beta$ 2-integrin forms part of the heterodimer LFA-1, which facilitates firm adhesion on blood vessel endothelium via ICAM-1, a critical stage in lymphocyte trafficking (Fagerholm et al., 2019).  $\beta$ 2-integrin also regulates the immunological synapse providing a co-stimulatory signal, both in the interaction with antigen-presenting cells and with infected target cells (Liu et al., 2009). LFA-1 is upregulated on liver-resident T cells and facilitates their patrolling of hepatic sinusoids, indicating a role for LFA-1 in T<sub>RM</sub> cell motility and tissue surveillance (McNamara et al., 2017).  $\beta$ 2-integrin and its interactions with ICAM-1 have been implicated in murine IEL development and function (Huleatt and Lefrançois, 1996). Intriguingly, the interaction of LFA-1 with ICAM-1 reduces cellular responses to tumor growth factor beta (TGF- $\beta$ ), a key cytokine in T<sub>RM</sub> cell development (Verma et al., 2012), whereas TGF- $\beta$  can inhibit LFA-1 expression and function (Boutet et al., 2016). This suggests a possible role for  $\beta$ 2-integrin in the development of CD69<sup>+</sup>CD103<sup>-</sup> CD8<sup>+</sup> T<sub>RM</sub> cells, which may be TGF- $\beta$ -independent, as it is in mice (Bergsbaken and Bevan, 2015).

The *ITGB2* locus is a differentially methylated region in the blood and mucosa in IBD, and mucosal gene expression is associated with disease activity (Harris et al., 2014; Ventham et al., 2016; Román et al., 2013). We hypothesize that this association with IBD, in which T<sub>RM</sub> cells have a key role (Zundler et al., 2019), could be mediated via altered  $\beta$ 2-integrin expression and its effects on T<sub>RM</sub> cells, or suggest a pathogenic role for one of the two T<sub>RM</sub> cell subsets.

Single-cell transcriptional heterogeneity has previously been examined in lung T<sub>RM</sub> cells, with two potential subsets identified, characterized by predominantly different gene signatures to those in our study (Snyder et al., 2019). However, the subsets contained both CD4<sup>+</sup> and CD8<sup>+</sup> cells co-clustering, which separated clearly in our study. Moreover, the lung T<sub>RM</sub> cell subsets did

not align with CD103 expression, in contrast to our work, and the transcriptional signatures of the clusters were also different. T<sub>RM</sub> cell phenotype and behavior in the lung and in the intestine differ substantially (Thome et al., 2014), and this finding may be driven by such tissue-specific differences or may be an effect of the higher cell number in our study, allowing greater power to detect transcriptionally distinct sub-clusters. It remains unclear whether analogous subsets to the intestinal populations described in this study exist in other tissues, whether such subsets differ in residency characteristics and functional capacity, and whether they have distinct roles in human health and disease.

In conclusion, we have used the human model of intestinal transplantation to study single-cell heterogeneity in the donor-derived, bona fide intestinal T<sub>RM</sub> cells. We found that CD8<sup>+</sup> T<sub>RM</sub> cells comprise two transcriptionally, phenotypically, and functionally distinct, subsets with parallel findings in CD4<sup>+</sup> T cells. In particular, we report the association of  $\beta$ 2-integrin expression with CD69<sup>+</sup>CD103<sup>-</sup> intestinal T<sub>RM</sub> cells. In addition to providing a useful marker for this population,  $\beta$ 2-integrin could have a role in T<sub>RM</sub> cell development and function.

## STAR★METHODS

Detailed methods are provided in the online version of this paper and include the following:

- KEY RESOURCES TABLE
- RESOURCE AVAILABILITY
  - Lead contact
  - Materials availability
  - Data and code availability
- EXPERIMENTAL MODEL AND SUBJECT DETAILS
  - Human samples
- METHOD DETAILS
  - *Ex vivo* stimulation
  - Flow cytometry and cell sorting
  - Chip cytometry
  - 10 $\times$  Genomics library preparation and sequencing
  - Smart-Seq2 library preparation and sequencing
- QUANTIFICATION AND STATISTICAL ANALYSIS
  - Graphs and statistical analyses
  - Flow cytometry data analysis and statistics
  - Droplet-based (10 $\times$  Genomics) scRNA-seq data analysis
  - TCR clonotype analysis (10 $\times$  Genomics)
  - Plate-based (Smart-Seq2) scRNA-seq data analysis
  - Data integration with published datasets
  - Identification of TF regulons

## SUPPLEMENTAL INFORMATION

Supplemental Information can be found online at <https://doi.org/10.1016/j.celrep.2020.108661>.

## ACKNOWLEDGMENTS

We thank the Oxford TGU GI illnesses biobank team and the clinicians and endoscopists at Oxford University Hospitals NHS Foundation Trust, in particular Dr Vincent Cheung, for assistance in patient identification and sample

collection. We are grateful to Dr. Chris Willberg and Joachim Hagel at the Peter Medawar Building for work establishing the chip cytometry facility. We are grateful to Professor Laura Mackay for her advice in the conception of this project. We are grateful to Dr. Agne Antanaviciute, Dr. Daniele Corridoni, and Dr. Tarun Gupta for their assistance in providing transcriptomic datasets from their recent publication. We thank the Oxford Genomics Centre at the Wellcome Centre for Human Genetics (funded by Wellcome Trust grant reference 203141/Z/16/Z) for the generation of sequencing data. The research was funded by the Wellcome Trust (WT 109665MA), NIHR Senior Fellowship (P.K.), and National Institute for Health Research (NIHR) Oxford Biomedical Research Centre (BRC). L.C.G. is supported by a Wellcome Trust PhD studentship (109028/Z/15/Z). The authors have no additional financial interests. The views expressed are those of the author(s) and not necessarily those of the NHS, the NIHR, or the Department of Health.

#### AUTHOR CONTRIBUTIONS

M.E.B.F., N.M.P., L.C.G., P.K., and P.J.A. conceived and designed the study. Patient identification, consent, and sample collection were performed by M.E.B.F., T.A., P.F., G.V., S.R., and P.J.A. Experiments and analyses were performed by M.E.B.F., N.M.P., L.C.G., K.P., A.A., S.L.I., and H.F. Cell sorting was performed by H.F. M.E.B.F., N.M.P., and L.C.G. created the figures. M.E.B.F. wrote the article. All authors critically revised the article and approved the final version.

#### DECLARATION OF INTERESTS

The authors declare no competing interests.

Received: March 4, 2020  
Revised: October 14, 2020  
Accepted: December 22, 2020  
Published: January 19, 2021

#### REFERENCES

Adachi, T., Kobayashi, T., Sugihara, E., Yamada, T., Ikuta, K., Pittaluga, S., Saya, H., Amagai, M., and Nagao, K. (2015). Hair follicle-derived IL-7 and IL-15 mediate skin-resident memory T cell homeostasis and lymphoma. *Nat. Med.* *21*, 1272–1279.

Aibar, S., González-Blas, C.B., Moerman, T., Huynh-Thu, V.A., Imrichova, H., Huiselmans, G., Rambow, F., Marine, J.-C., Geurts, P., Aerts, J., et al. (2017). SCENIC: single-cell regulatory network inference and clustering. *Nat. Methods* *14*, 1083–1086.

Andrews, T.S., Hemberg, M., and Hemberg, M. (2019). M3Drop: dropout-based feature selection for scRNASeq. *Bioinformatics* *35*, 2865–2867.

Ariotti, S., Hogenbirk, M.A., Dijkgraaf, F.E., Visser, L.L., Hoekstra, M.E., Song, J.-Y., Jacobs, H., Haanen, J.B., and Schumacher, T.N. (2014). Skin-resident memory CD8<sup>+</sup> T cells trigger a state of tissue-wide pathogen alert. *Science* *346*, 101–105.

Bartolomé-Casado, R., Landsverk, O.J.B., Chauhan, S.K., Richter, L., Phung, D., Greiff, V., Risnes, L.F., Yao, Y., Neumann, R.S., Yaqub, S., et al. (2019). Resident memory CD8 T cells persist for years in human small intestine. *J. Exp. Med.* *216*, 2412–2426.

Bartolomé-Casado, R., Landsverk, O.J.B., Chauhan, S.K., Sætre, F., Hagen, K.T., Yaqub, S., Øyen, O., Horneland, R., Aandahl, E.M., Aabakken, L., et al. (2020). CD4<sup>+</sup> T cells persist for years in the human small intestine and display a T<sub>H</sub>1 cytokine profile. *Mucosal Immunol.* Published online June 22, 2020. <https://doi.org/10.1038/s41385-020-0315-5>.

Bergsbaken, T., and Bevan, M.J. (2015). Proinflammatory microenvironments within the intestine regulate the differentiation of tissue-resident CD8<sup>+</sup> T cells responding to infection. *Nat. Immunol.* *16*, 406–414.

Beura, L.K., Wijeyesinghe, S., Thompson, E.A., Macchietto, M.G., Rosato, P.C., Pierson, M.J., Schenkel, J.M., Mitchell, J.S., Vezyz, V., Fife, B.T., et al.

(2018). T Cells in Nonlymphoid Tissues Give Rise to Lymph-Node-Resident Memory T Cells. *Immunity* *48*, 327–338.e5.

Boddupalli, C.S., Nair, S., Gray, S.M., Nowyhed, H.N., Verma, R., Gibson, J.A., Abraham, C., Narayan, D., Vasquez, J., Hedrick, C.C., et al. (2016). ABC transporters and NR4A1 identify a quiescent subset of tissue-resident memory T cells. *J. Clin. Invest.* *126*, 3905–3916.

Bolger, A.M., Lohse, M., and Usadel, B. (2014). Trimmomatic: a flexible trimmer for Illumina sequence data. *Bioinformatics* *30*, 2114–2120.

Boutet, M., Gauthier, L., Leclerc, M., Gros, G., de Montpreville, V., Thérêt, N., Donnadieu, E., and Mami-Chouaib, F. (2016). TGFβ signaling intersects with CD103 integrin signaling to promote T-lymphocyte accumulation and anti-tumor activity in the lung tumor microenvironment. *Cancer Res.* *76*, 1757–1769.

Butler, A., Hoffman, P., Smibert, P., Papalexi, E., and Satija, R. (2018). Integrating single-cell transcriptomic data across different conditions, technologies, and species. *Nat. Biotechnol.* *36*, 411–420.

Corridoni, D., Antanaviciute, A., Gupta, T., Fawcner-Corbett, D., Alicino, A., Jagielowicz, M., Parikh, K., Repapi, E., Taylor, S., Ishikawa, D., et al. (2020). Single-cell atlas of colonic CD8<sup>+</sup> T cells in ulcerative colitis. *Nat. Med.* *26*, 1480–1490.

de Leur, K., Dieterich, M., Hesselink, D.A., Corneth, O.B.J., Dor, F.J.M.F., de Graav, G.N., Peeters, A.M.A., Mulder, A., Kimenai, H.J.A.N., Claas, F.H.J., et al. (2019). Characterization of donor and recipient CD8<sup>+</sup> tissue-resident memory T cells in transplant nephrectomies. *Sci. Rep.* *9*, 5984.

Dobin, A., Davis, C.A., Schlesinger, F., Drenkow, J., Zaleski, C., Jha, S., Batut, P., Chaisson, M., and Gingeras, T.R. (2013). STAR: ultrafast universal RNA-seq aligner. *Bioinformatics* *29*, 15–21.

Fagerholm, S.C., Guenther, C., Llorca Asens, M., Savinko, T., and Uotila, L.M. (2019). β2-Integrins and interacting proteins in leukocyte trafficking, immune suppression, and immunodeficiency disease. *Front. Immunol.* *10*, 254.

Feau, S., Arens, R., Togher, S., and Schoenberger, S.P. (2011). Autocrine IL-2 is required for secondary population expansion of CD8<sup>+</sup> memory T cells. *Nat. Immunol.* *12*, 908–913.

Fergusson, J.R., Hühn, M.H., Swadlow, L., Walker, L.J., Kurioka, A., Llibre, A., Bertoletti, A., Holländer, G., Newell, E.W., Davis, M.M., et al. (2016). CD161<sup>int</sup>CD8<sup>+</sup> T cells: a novel population of highly functional, memory CD8<sup>+</sup> T cells enriched within the gut. *Mucosal Immunol.* *9*, 401–413.

Fu, J., Zuber, J., Martinez, M., Shonts, B., Obradovic, A., Wang, H., Lau, S.-P., Xia, A., Waffarn, E.E., Frangaj, K., et al. (2019). Human intestinal allografts contain functional hematopoietic stem and progenitor cells that are maintained by a circulating pool. *Cell Stem Cell* *24*, 227–239.e8.

Gebhardt, T., Whitney, P.G., Zaid, A., Mackay, L.K., Brooks, A.G., Heath, W.R., Carbone, F.R., and Mueller, S.N. (2011). Different patterns of peripheral migration by memory CD4<sup>+</sup> and CD8<sup>+</sup> T cells. *Nature* *477*, 216–219.

Gutierrez-Arcelus, M., Teslovich, N., Mola, A.R., Polidoro, R.B., Nathan, A., Kim, H., Hannes, S., Slowikowski, K., Watts, G.F.M., Korsunsky, I., et al. (2019). Lymphocyte innateness defined by transcriptional states reflects a balance between proliferation and effector functions. *Nat. Commun.* *10*, 687.

Harris, R.A., Nagy-Szakal, D., Mir, S.A., Frank, E., Szigeti, R., Kaplan, J.L., Bronsky, J., Opekun, A., Ferry, G.D., Winter, H., and Kellermayer, R. (2014). DNA methylation-associated colonic mucosal immune and defense responses in treatment-naïve pediatric ulcerative colitis. *Epigenetics* *9*, 1131–1137.

Hennig, C., Adams, N., and Hansen, G. (2009). A versatile platform for comprehensive chip-based explorative cytometry. *Cytometry A* *75*, 362–370.

Hombrink, P., Helbig, C., Backer, R.A., Piet, B., Oja, A.E., Stark, R., Brasser, G., Jongejan, A., Jonkers, R.E., Nota, B., et al. (2016). Programs for the persistence, vigilance and control of human CD8<sup>+</sup> lung-resident memory T cells. *Nat. Immunol.* *17*, 1467–1478.

Huang, W., Sherman, B.T., and Lempicki, R.A. (2009). Systematic and integrative analysis of large gene lists using DAVID bioinformatics resources. *Nat. Protoc.* *4*, 44–57.



- Huleatt, J.W., and Lefrançois, L. (1996).  $\beta 2$  integrins and ICAM-1 are involved in establishment of the intestinal mucosal T cell compartment. *Immunity* **5**, 263–273.
- Kiselev, V.Y., Kirschner, K., Schaub, M.T., Andrews, T., Yiu, A., Chandra, T., Natarajan, K.N., Reik, W., Barahona, M., Green, A.R., and Hemberg, M. (2017). SC3: consensus clustering of single-cell RNA-seq data. *Nat. Methods* **14**, 483–486.
- Konnikova, L., Boschetti, G., Rahman, A., Mitsialis, V., Lord, J., Richmond, C., Tomov, V.T., Gordon, W., Jelinsky, S., Canavan, J., et al. (2018). High-dimensional immune phenotyping and transcriptional analyses reveal robust recovery of viable human immune and epithelial cells from frozen gastrointestinal tissue. *Mucosal Immunol.* **11**, 1684–1693.
- Kumar, B.V., Ma, W., Miron, M., Granot, T., Guyer, R.S., Carpenter, D.J., Senda, T., Sun, X., Ho, S.-H., Lerner, H., et al. (2017). Human tissue-resident memory t cells are defined by core transcriptional and functional signatures in lymphoid and mucosal sites. *Cell Rep.* **20**, 2921–2934.
- Kurd, N.S., He, Z., Louis, T.L., Milner, J.J., Omilusik, K.D., Jin, W., Tsai, M.S., Widjaja, C.E., Kanbar, J.N., Olvera, J.G., et al. (2020). Early precursors and molecular determinants of tissue-resident memory CD8<sup>+</sup> T lymphocytes revealed by single-cell RNA sequencing. *Sci. Immunol.* **5**, eaaz6894.
- Lambert, S.A., Jolma, A., Campitelli, L.F., Das, P.K., Yin, Y., Albu, M., Chen, X., Taipale, J., Hughes, T.R., and Weirauch, M.T. (2018). The Human Transcription Factors. *Cell* **172**, 650–665.
- Leng, T., Akther, H.D., Hackstein, C.-P., Powell, K., King, T., Friedrich, M., Christoforidou, Z., McCuaig, S., Neyazi, M., Arancibia-Cárcamo, C.V., et al.; Oxford IBD Investigators (2019). TCR and inflammatory signals tune human MAIT cells to exert specific tissue repair and effector functions. *Cell Rep.* **28**, 3077–3091.e5.
- Li, H., Handsaker, B., Wysoker, A., Fennell, T., Ruan, J., Homer, N., Marth, G., Abecasis, G., Durbin, R., Ruan, J., et al.; 1000 Genome Project Data Processing Subgroup (2009). The sequence alignment/map format and SAMtools. *Bioinformatics* **25**, 2078–2079.
- Liao, Y., Smyth, G.K., Shi, W., Smyth, G.K., Shi, W., and Shi, W. (2014). featureCounts: an efficient general purpose program for assigning sequence reads to genomic features. *Bioinformatics* **30**, 923–930.
- Liu, D., Bryceson, Y.T., Meckel, T., Vasiliver-Shamis, G., Dustin, M.L., and Long, E.O. (2009). Integrin-dependent organization and bidirectional vesicular traffic at cytotoxic immune synapses. *Immunity* **31**, 99–109.
- Lun, A.T.L., McCarthy, D.J., and Marioni, J.C. (2016). A step-by-step workflow for low-level analysis of single-cell RNA-seq data with Bioconductor. *F1000Res.* **5**, 2122.
- Mackay, L.K., and Kallies, A. (2017). Transcriptional regulation of tissue-resident lymphocytes. *Trends Immunol.* **38**, 94–103.
- Mackay, L.K., Minnich, M., Kragten, N.A.M., Liao, Y., Nota, B., Seillet, C., Zaid, A., Man, K., Preston, S., Freestone, D., et al. (2016). Hobit and Blimp1 instruct a universal transcriptional program of tissue residency in lymphocytes. *Science* **352**, 459–463.
- Martin, J.C., Chang, C., Boschetti, G., Ungaro, R., Giri, M., Grout, J.A., Gettler, K., Chuang, L.-S., Nayar, S., Greenstein, A.J., et al. (2019). Single-cell analysis of crohn’s disease lesions identifies a pathogenic cellular module associated with resistance to anti-TNF therapy. *Cell* **178**, 1493–1508.e20.
- Mayassi, T., Ladell, K., Gudjonson, H., McLaren, J.E., Shaw, D.G., Tran, M.T., Rokicka, J.J., Lawrence, I., Grenier, J.-C., van Unen, V., et al. (2019). Chronic inflammation permanently reshapes tissue-resident immunity in celiac disease. *Cell* **176**, 967–981.e19.
- McCarthy, D.J., Campbell, K.R., Lun, A.T.L., and Wills, Q.F. (2017). Scater: pre-processing, quality control, normalization and visualization of single-cell RNA-seq data in R. *Bioinformatics* **33**, 1179–1186.
- McInnes, L., Healy, J., and Melville, J. (2018). UMAP: uniform manifold approximation and projection for dimension reduction. *arXiv*, arxiv.org/abs/1802.03426v2.
- McNamara, H.A., Cai, Y., Wagle, M.V., Sontani, Y., Roots, C.M., Miosge, L.A., O’Connor, J.H., Sutton, H.J., Ganusov, V.V., Heath, W.R., Bertolino, P., Goodnow, C.G., Parish, I.A., Enders, A., and Cockburn, I.A. (2017). Up-regulation of LFA-1 allows liver-resident memory T cells to patrol and remain in the hepatic sinusoids. *Sci. Immunol.* **2**, eaaj1996.
- Miao, Z., Deng, K., Wang, X., and Zhang, X. (2018). DEsingle for detecting three types of differential expression in single-cell RNA-seq data. *Bioinformatics* **34**, 3223–3224.
- Milner, J.J., Toma, C., Yu, B., Zhang, K., Omilusik, K., Phan, A.T., Wang, D., Getzler, A.J., Nguyen, T., Crotty, S., et al. (2017). Runx3 programs CD8<sup>+</sup> T cell residency in non-lymphoid tissues and tumours. *Nature* **552**, 253–257.
- Moerman, T., Aibar Santos, S., Bravo González-Blas, C., Simm, J., Moreau, Y., Aerts, J., and Aerts, S. (2019). GRNBoost2 and Arboreto: efficient and scalable inference of gene regulatory networks. *Bioinformatics* **35**, 2159–2161.
- Oja, A.E., Piet, B., Helbig, C., Stark, R., van der Zwan, D., Blaauwgeers, H., Remmerswaal, E.B.M., Amsen, D., Jonkers, R.E., Moerland, P.D., et al. (2018). Trigger-happy resident memory CD4<sup>+</sup> T cells inhabit the human lungs. *Mucosal Immunol.* **11**, 654–667.
- Omilusik, K.D., Best, J.A., Yu, B., Goossens, S., Weidemann, A., Nguyen, J.V., Seuntjens, E., Stryjewska, A., Zweier, C., Roychoudhuri, R., et al. (2015). Transcriptional repressor ZEB2 promotes terminal differentiation of CD8<sup>+</sup> effector and memory T cell populations during infection. *J. Exp. Med.* **212**, 2027–2039.
- Pallett, L.J., Davies, J., Colbeck, E.J., Robertson, F., Hansi, N., Easom, N.J.W., Burton, A.R., Stegmann, K.A., Schurich, A., Swadling, L., et al. (2017). IL-2<sup>high</sup> tissue-resident T cells in the human liver: sentinels for hepatotropic infection. *J. Exp. Med.* **214**, 1567–1580.
- Park, S.L., Gebhardt, T., and Mackay, L.K. (2019). Tissue-resident memory T cells in cancer immunosurveillance. *Trends Immunol.* **40**, 735–747.
- Picelli, S., Björklund, Å.K., Faridani, O.R., Sagasser, S., Winberg, G., and Sandberg, R. (2013). Smart-seq2 for sensitive full-length transcriptome profiling in single cells. *Nat. Methods* **10**, 1096–1098.
- Picelli, S., Faridani, O.R., Björklund, A.K., Winberg, G., Sagasser, S., and Sandberg, R. (2014). Full-length RNA-seq from single cells using Smart-seq2. *Nat. Protoc.* **9**, 171–181.
- Provine, N.M., Binder, B., FitzPatrick, M.E.B., Schuch, A., Garner, L.C., Williamson, K.D., van Wilgenburg, B., Thimme, R., Klenerman, P., and Hofmann, M. (2018). Unique and common features of innate-like human V $\delta 2^+$   $\gamma\delta$ T cells and mucosal-associated invariant T cells. *Front. Immunol.* **9**, 756.
- Raeber, M.E., Zurbuchen, Y., Impellizzeri, D., and Boyman, O. (2018). The role of cytokines in T-cell memory in health and disease. *Immunol. Rev.* **283**, 176–193.
- Román, J., Planell, N., Lozano, J.J., Aceituno, M., Esteller, M., Pontes, C., Balsa, D., Merlos, M., Panés, J., and Salas, A. (2013). Evaluation of responsive gene expression as a sensitive and specific biomarker in patients with ulcerative colitis. *Inflamm. Bowel Dis.* **19**, 221–229.
- Sancho, D., Gómez, M., and Sánchez-Madrid, F. (2005). CD69 is an immunoregulatory molecule induced following activation. *Trends Immunol.* **26**, 136–140.
- Schenkel, J.M., Fraser, K.A., Beura, L.K., Pauken, K.E., Vezy, V., and Masopust, D. (2014). T cell memory. Resident memory CD8 T cells trigger protective innate and adaptive immune responses. *Science* **346**, 98–101.
- Shiow, L.R., Rosen, D.B., Brdicková, N., Xu, Y., An, J., Lanier, L.L., Cyster, J.G., and Matloubian, M. (2006). CD69 acts downstream of interferon- $\alpha/\beta$  to inhibit S1P1 and lymphocyte egress from lymphoid organs. *Nature* **440**, 540–544.
- Snyder, M.E., Finlayson, M.O., Connors, T.J., Dogra, P., Senda, T., Bush, E., Carpenter, D., Marboe, C., Benvenuto, L., Shah, L., et al. (2019). Generation and persistence of human tissue-resident memory T cells in lung transplantation. *Sci. Immunol.* **4**, eaav5581–17.
- Stuart, T., Butler, A., Hoffman, P., Hafemeister, C., Papalexi, E., Mauck, W.M., 3rd, Hao, Y., Stoeckius, M., Smibert, P., and Satija, R. (2019). Comprehensive integration of single-cell data. *Cell* **177**, 1888–1902.e21.
- Subramanian, A., Tamayo, P., Mootha, V.K., Mukherjee, S., Ebert, B.L., Gillette, M.A., Paulovich, A., Pomeroy, S.L., Golub, T.R., Lander, E.S., and Mesirov, J.P. (2005). Gene set enrichment analysis: a knowledge-based approach

for interpreting genome-wide expression profiles. *Proc. Natl. Acad. Sci. USA* **102**, 15545–15550.

Szabo, P.A., Miron, M., and Farber, D.L. (2019). Location, location, location: tissue resident memory T cells in mice and humans. *Sci. Immunol.* **4**, aas9673.

Thome, J.J.C., Yudanin, N., Ohmura, Y., Kubota, M., Grinshpun, B., Sathaliyawa, T., Kato, T., Lerner, H., Shen, Y., and Farber, D.L. (2014). Spatial map of human T cell compartmentalization and maintenance over decades of life. *Cell* **159**, 814–828.

Thompson, E.A., Mitchell, J.S., Beura, L.K., Torres, D.J., Mrass, P., Pierson, M.J., Cannon, J.L., Masopust, D., Fife, B.T., and Vezys, V. (2019). Interstitial migration of CD8 $\alpha\beta$  T cells in the small intestine is dynamic and is dictated by environmental cues. *Cell Rep.* **26**, 2859–2867.e4.

Van de Sande, B., Flerin, C., Davie, K., De Waegeneer, M., Hulselmans, G., Aibar, S., Seurinck, R., Saelens, W., Cannoodt, R., Rouchon, Q., et al. (2020). A scalable SCENIC workflow for single-cell gene regulatory network analysis. *Nat. Protoc.* **15**, 2247–2276.

Ventham, N.T., Kennedy, N.A., Adams, A.T., Kalla, R., Heath, S., O’Leary, K.R., Drummond, H., Wilson, D.C., Gut, I.G., Nimmo, E.R., et al.; IBD BIOM consortium; IBD CHARACTER consortium (2016). Integrative epigenome-wide analysis demonstrates that DNA methylation may mediate genetic risk in inflammatory bowel disease. *Nat. Commun.* **7**, 13507.

Verma, N.K., Dempsey, E., Long, A., Davies, A., Barry, S.P., Fallon, P.G., Volkov, Y., and Kelleher, D. (2012). Leukocyte function-associated antigen-1/

intercellular adhesion molecule-1 interaction induces a novel genetic signature resulting in T-cells refractory to transforming growth factor- $\beta$  signaling. *J. Biol. Chem.* **287**, 27204–27216.

Walsh, D.A., Borges da Silva, H., Beura, L.K., Peng, C., Hamilton, S.E., Masopust, D., and Jameson, S.C. (2019). The functional requirement for CD69 in establishment of resident memory CD8<sup>+</sup>T cells varies with tissue location. *J. Immunol.* **203**, 946–955.

Zimmerli, S.C., Harari, A., Cellerai, C., Vallelian, F., Bart, P.-A., and Pantaleo, G. (2005). HIV-1-specific IFN- $\gamma$ /IL-2-secreting CD8 T cells support CD4-independent proliferation of HIV-1-specific CD8 T cells. *Proc. Natl. Acad. Sci. USA* **102**, 7239–7244.

Zuber, J., Rosen, S., Shonts, B., Sprangers, B., Savage, T.M., Richman, S., Yang, S., Lau, S.P., DeWolf, S., Farber, D., et al. (2015). Macrochimerism in intestinal transplantation: association with lower rejection rates and multivisceral transplants, without GVHD. *Am. J. Transplant.* **15**, 2691–2703.

Zuber, J., Shonts, B., Lau, S.P., Obradovic, A., Fu, J., Yang, S., Lambert, M., Coley, S., Weiner, J., Thome, J., et al. (2016). Bidirectional intra-graft alloreactivity drives the repopulation of human intestinal allografts and correlates with clinical outcome. *Sci. Immunol.* **1**, eaah3732.

Zundler, S., Becker, E., Spocinska, M., Slawik, M., Parga-Vidal, L., Stark, R., Wiendl, M., Atreya, R., Rath, T., Leppkes, M., et al. (2019). Hobit- and Blimp-1-driven CD4<sup>+</sup> tissue-resident memory T cells control chronic intestinal inflammation. *Nat. Immunol.* **20**, 288–300.

STAR★METHODS

KEY RESOURCES TABLE

| REAGENT or RESOURCE                                      | SOURCE                   | IDENTIFIER       |
|----------------------------------------------------------|--------------------------|------------------|
| <b>Antibodies</b>                                        |                          |                  |
| Anti-human CD3 (clone OKT3) BV785                        | BioLegend                | Cat# 317329      |
| Anti-human CD3 (clone UCHT1) AF700                       | BioLegend                | Cat# 300423      |
| Anti-human CD3 (clone UCHT1) PerCP                       | BioLegend                | Cat# 300427      |
| Anti-human V $\delta$ 2 (clone B6) BV711                 | BioLegend                | Cat# 331411      |
| Anti-human CD4 (clone OKT4) BV650                        | BioLegend                | Cat# 317435      |
| Anti-human CD4 (clone SK3) BUV805                        | BD Biosciences           | Cat# 612888      |
| Anti-human CD4 (clone RPA-T4) PerCP                      | BioLegend                | Cat# 300527      |
| Anti-human V $\alpha$ 7.2 (clone 3C10) BV605             | BioLegend                | Cat# 351719      |
| Anti-human CD45RA (clone HI100) BV785                    | BioLegend                | Cat# 304139      |
| Anti-human CD103 (clone Ber-ACT8) BV421                  | BioLegend                | Cat# 350213      |
| Anti-human CD103 (clone Ber-ACT8) APC-Cy7                | BioLegend                | Cat# 350227      |
| Anti-human CD103 (clone Ber-ACT8) PE                     | BioLegend                | Cat# 350205      |
| Anti-human $\gamma\delta$ TCR (clone 11F2) FITC          | Miltenyi Biotec          | Cat# 130-114-029 |
| Anti-human $\gamma\delta$ TCR (clone 11F2) VioBlue       | Miltenyi Biotec          | Cat# 130-113-507 |
| Anti-human $\gamma\delta$ TCR (clone 5A6.E9) PE          | Thermo Fisher Scientific | Cat# MHGD04      |
| Anti-human $\beta$ 7-integrin (clone FIB504) PerCP-Cy5.5 | BioLegend                | Cat# 321219      |
| Anti-human CD18 (clone L130) BUV563                      | BD Biosciences           | Cat# 749441      |
| Anti-human CD18 (clone 7E4) PE                           | Beckman Coulter          | Cat# IM157OU     |
| Anti-human CD45 (clone HI30) FITC                        | BioLegend                | Cat# 304038      |
| Anti-human CD69 (clone FN50) PE-Dazzle                   | BioLegend                | Cat# 310941      |
| Anti-human CD69 (clone FN50) BUV395                      | BD Biosciences           | Cat# 564364      |
| Anti-human CCR7 (clone G043H7) PE Dazzle                 | BioLegend                | Cat# 353235      |
| Anti-human CCR9 (clone L053E8) PE-Cy7                    | BioLegend                | Cat# 358909      |
| Anti-human CD8 (clone SK1) AF700                         | BioLegend                | Cat# 344723      |
| Anti-human CD8 (clone SK1) FITC                          | BioLegend                | Cat# 344704      |
| Anti-human CD8 (clone RPA-T8) AF532                      | Thermo Fisher Scientific | Cat# 58-0088-42  |
| Anti-human CD161 (clone 191B8) APC                       | Miltenyi Biotec          | Cat# 130-113-591 |
| Anti-human CD161 (clone 191B8) FITC                      | Miltenyi Biotec          | Cat# 130-113-592 |
| Anti-human CD161 (clone 191B8) PE                        | Miltenyi Biotec          | Cat# 130-092-677 |
| Anti-human HLA-A3 (clone GAP.A3) PE                      | Thermo Fisher Scientific | Cat# 12-5754-41  |
| Anti-human HLA-A2 (clone BB7.2) PE                       | BioLegend                | Cat# 343306      |
| Anti-human CD127 (clone A019D5) BV650                    | BioLegend                | Cat# 351325      |
| Anti-human CD127 (clone REA614) PE                       | Miltenyi Biotec          | Cat# 130-113-976 |
| Anti-human CD7 (clone M-T701) BB700                      | BD Biosciences           | Cat# 566489      |
| Anti-human KLRG1 (clone REA261) VioBlue                  | Miltenyi Biotec          | Cat# 130-123-526 |
| Anti-human KLRG1 (clone SA231A2) PE                      | BioLegend                | Cat# 367711      |
| Anti-human CCL4 (clone D21-1351) BV421                   | BD Biosciences           | Cat# 562900      |
| Anti-human Ki-67 (clone B56) BV480                       | BD Biosciences           | Cat# 566172      |
| Anti-human Granzyme B (clone GB11) BV510                 | BD Biosciences           | Cat# 563388      |
| Anti-human TNF- $\alpha$ (clone OKT3) BV650              | BioLegend                | Cat# 502935      |
| Anti-human IL-17A (clone BL168) BV711                    | BioLegend                | Cat# 512327      |
| Anti-human IFN- $\gamma$ (clone B27) BV750               | BD Biosciences           | Cat# 566357      |
| Anti-human IL-2 (clone MQ1-17H12) PE-Dazzle              | BioLegend                | Cat# 500343      |

(Continued on next page)

**Continued**

| REAGENT or RESOURCE                          | SOURCE                   | IDENTIFIER    |
|----------------------------------------------|--------------------------|---------------|
| Anti-human Granzyme K (clone GM26E7) PE-Cy7  | BioLegend                | Cat# 370515   |
| Anti-human Granzyme K (clone GM26E7) PE      | BioLegend                | Cat# 370511   |
| Anti-human IL-10 (clone JES3-9D7) APC        | BioLegend                | Cat# 501409   |
| Anti-human pan Cytokeratin (clone C-11) FITC | GeneTex                  | Cat# GTX11212 |
| Anti-human Histone H3 (clone 17H2L9) AF488   | Invitogen                | Cat# MA702023 |
| Near-IR Live-Dead amine-reactive dye         | Thermo Fisher Scientific | Cat# L10119   |
| Zombie Yellow Fixable Viability dye          | BioLegend                | Cat# 423103   |

**Biological samples**

|                                                        |                          |                                                                                                     |
|--------------------------------------------------------|--------------------------|-----------------------------------------------------------------------------------------------------|
| Leukocyte cones                                        | NHS Blood and Transplant | <a href="https://www.nhsbt.nhs.uk">https://www.nhsbt.nhs.uk</a>                                     |
| Intestinal biopsies (intestinal transplant recipients) | TGU Biobank              | <a href="http://www.expmedndm.ox.ac.uk/tgu/tgu/home">http://www.expmedndm.ox.ac.uk/tgu/tgu/home</a> |
| Peripheral blood (intestinal transplant recipients)    | TGU Biobank              | As above                                                                                            |
| Intestinal biopsies (unaffected control subjects)      | TGU Biobank              | As above                                                                                            |
| Peripheral blood (unaffected control subjects)         | TGU Biobank              | As above                                                                                            |

**Chemicals, peptides, and recombinant proteins**

|                                                       |                          |                   |
|-------------------------------------------------------|--------------------------|-------------------|
| DNase I                                               | Roche/ Merck             | Cat# 11284932001  |
| Percoll                                               | GE Healthcare/ Merck     | Cat# GE17-0891-01 |
| LymphoPrep                                            | Axis Shield              | Cat# 07851        |
| Cytofix/Cytoperm kit                                  | BD Biosciences           | Cat# 554714       |
| Cytofix                                               | BD Biosciences           | Cat# 554655       |
| DAPI (4',6-Diamidino-2-Phenylindole, Dihydrochloride) | Thermo Fisher Scientific | Cat# D1306        |
| Brilliant Stain Buffer Plus                           | BD Biosciences           | Cat# 566385       |

**Critical commercial assays**

|                                                         |              |                 |
|---------------------------------------------------------|--------------|-----------------|
| Cell Activation cocktail (without Brefeldin A)          | Biolegend    | Cat# 423301     |
| Brefeldin A                                             | Biolegend    | Cat# 420601     |
| Monensin                                                | Biolegend    | Cat# 420701     |
| Chromium Single Cell 5' Library & Gel Bead Kit          | 10x Genomics | Cat# PN-1000014 |
| Chromium Single Cell 5' Library Construction Kit        | 10x Genomics | Cat# PN-1000020 |
| Chromium Single Cell V(D)J Enrichment Kit, Human T Cell | 10x Genomics | Cat# PN-1000005 |
| Chromium Single Cell A Chip Kit                         | 10x Genomics | Cat# PN-1000009 |

**Deposited data**

|                                                                                                    |                                        |                                                                                                                               |
|----------------------------------------------------------------------------------------------------|----------------------------------------|-------------------------------------------------------------------------------------------------------------------------------|
| scRNA-seq (10x genomics) – 1 transplant donor - intestinal tissue resident memory T cells          | This paper                             | GEO: GSE162687                                                                                                                |
| scRNA-seq (Smartseq2) – 2 transplant donors – intestinal tissue resident memory T cells (CD103-/+) | This paper                             | GEO: GSE162687                                                                                                                |
| scRNA-seq of ileal immune cells                                                                    | <a href="#">Martin et al., 2019</a>    | <a href="https://scdissector.org/martin/">https://scdissector.org/martin/</a>                                                 |
| scRNA-seq of murine intestinal tissue resident memory T cells post-LCMV infection                  | <a href="#">Kurd et al., 2020</a>      | <a href="https://immunology.sciencemag.org/content/5/47/eaaz6894">https://immunology.sciencemag.org/content/5/47/eaaz6894</a> |
| scRNA-seq of colonic CD8+ T cells                                                                  | <a href="#">Corridoni et al., 2020</a> | GEO: GSE148837 / GSE148505                                                                                                    |

**Software and algorithms**

|                         |                                                                                 |                                                                                             |
|-------------------------|---------------------------------------------------------------------------------|---------------------------------------------------------------------------------------------|
| Prism Version 8         | GraphPad software                                                               | <a href="https://www.graphpad.com">https://www.graphpad.com</a>                             |
| ZellExplorer            | Zellkraftwerk GmbH                                                              | <a href="http://www.zellkraftwerk.com/products/">http://www.zellkraftwerk.com/products/</a> |
| FlowJo v9.9.5 & v10.6.1 | FlowJo LLC                                                                      | <a href="https://www.flowjo.com/">https://www.flowjo.com/</a>                               |
| Cell Ranger v2.2.0      | 10x Genomics                                                                    | <a href="https://www.10xgenomics.com">https://www.10xgenomics.com</a>                       |
| Seurat v2.3.4           | ( <a href="#">Butler et al., 2018</a> );<br><a href="#">Stuart et al., 2019</a> | <a href="https://satijalab.org/seurat/">https://satijalab.org/seurat/</a>                   |
| Trimmomatic             | <a href="#">Bolger et al., 2014</a>                                             | <a href="http://www.usadellab.org/">http://www.usadellab.org/</a>                           |
| STAR v2.5.3a            | <a href="#">Dobin et al., 2013</a>                                              | <a href="https://github.com/alexdobin/STAR">https://github.com/alexdobin/STAR</a>           |
| Samtools v1.6           | <a href="#">Li et al., 2009</a>                                                 | <a href="https://github.com/samtools/samtools">https://github.com/samtools/samtools</a>     |

(Continued on next page)

**Continued**

| REAGENT or RESOURCE                 | SOURCE                   | IDENTIFIER                                                                                                                                            |
|-------------------------------------|--------------------------|-------------------------------------------------------------------------------------------------------------------------------------------------------|
| featureCounts v1.6.0                | Liao et al., 2014        | <a href="http://subread.sourceforge.net">http://subread.sourceforge.net</a>                                                                           |
| Scater v1.10.1                      | McCarthy et al., 2017    | <a href="https://www.bioconductor.org/packages/release/bioc/html/scater.html">https://www.bioconductor.org/packages/release/bioc/html/scater.html</a> |
| Scran v1.12.1                       | Lun et al., 2016         | <a href="https://bioconductor.org/packages/release/bioc/html/scrn.html">https://bioconductor.org/packages/release/bioc/html/scrn.html</a>             |
| M3Drop v3.10.4                      | Andrews et al., 2019     | <a href="https://www.bioconductor.org/packages/release/bioc/html/M3Drop.html">https://www.bioconductor.org/packages/release/bioc/html/M3Drop.html</a> |
| SC3 v1.12.0                         | Kiselev et al., 2017     | <a href="https://bioconductor.org/packages/release/bioc/html/SC3.html">https://bioconductor.org/packages/release/bioc/html/SC3.html</a>               |
| DEsingle v1.2.1                     | Miao et al., 2018        | <a href="https://bioconductor.org/packages/release/bioc/html/DEsingle.html">https://bioconductor.org/packages/release/bioc/html/DEsingle.html</a>     |
| DAVID web tools                     | Huang et al., 2009       | <a href="https://david.ncifcrf.gov/">https://david.ncifcrf.gov/</a>                                                                                   |
| Gene Set Enrichment Analysis v4.0.3 | Subramanian et al., 2005 | <a href="https://www.gsea-msigdb.org/gsea/">https://www.gsea-msigdb.org/gsea/</a>                                                                     |
| <b>Other</b>                        |                          |                                                                                                                                                       |
| Zellsafe Tissue chips               | Zellkraftwerk GmbH       | Cat# 28050606/02-010                                                                                                                                  |
| gentleMACS C Tubes                  | Miltenyi                 | Cat# 130-093-237                                                                                                                                      |

**RESOURCE AVAILABILITY**

**Lead contact**

Further information and requests for resources and reagents should be directed to and will be fulfilled by the Lead Contact, Paul Klenerman ([paul.klenerman@medawar.ox.ac.uk](mailto:paul.klenerman@medawar.ox.ac.uk)).

**Materials availability**

This study did not generate new unique reagents.

**Data and code availability**

The single-cell RNA sequencing datasets generated during this study are available on the Gene Expression Omnibus (GEO) database (<https://www.ncbi.nlm.nih.gov/geo/>), accession number GEO: GSE162687.

**EXPERIMENTAL MODEL AND SUBJECT DETAILS**

**Human samples**

Intestinal transplant recipients were identified via the Oxford University Hospitals NHS Foundation Trust (OUHFT) transplantation service (Oxford, United Kingdom). Healthy control study subjects were identified via the OUHFT endoscopy service at the time of routine endoscopy. Peripheral blood and intestinal biopsies were taken at the time of endoscopy under the study framework and consent of the Oxford Gastrointestinal Illnesses Biobank (REC Ref: 16/YH/0247). Patient and sample characteristics, including available information on gender, are described in [Table S1](#). The influence of gender was not specifically considered in the analysis of study data, due to limited sample size.

Small intestinal biopsies were collected at the time of endoscopy and transported in R10 (RPMI-1640 [Lonza] + 10% FCS [Sigma-Aldrich] + 1% penicillin/streptomycin [Sigma-Aldrich]), before cryopreservation in freezing medium (90% FCS [Sigma-Aldrich], 10% DMSO [Sigma-Aldrich]). This method preserves immune cell viability, surface marker expression, and function (Konnikova et al., 2018). When required, samples were rapidly thawed in a 37°C water bath and washed in 20 mL R10 before tissue dissociation.

Duodenal samples were incubated in R10 media with 1 mg/ml Collagenase D (Roche) and 100 µg/ml DNase (Thermo Fisher Scientific) for one hour in a shaking incubator at 37°C. Biopsies were then dissociated by vigorous agitation using a GentleMACS Dissociator (Miltenyi Biotec), then strained through a 70 µm filter. Cells were washed with R10 media. For samples undergoing *ex vivo* stimulation or cell sorting, the mononuclear cells were isolated on a discontinuous 70% and 35% Percoll gradient (GE Healthcare) by centrifugation at 700 g for 20 minutes without brake. Mononuclear cells were collected from the interface and washed in R10.

For multiplex fluorescence chip cytometry, single intestinal biopsies were embedded in OCT cryo-embedding matrix (Thermo Fisher Scientific) then frozen in isopentane (Sigma-Aldrich) suspended over liquid nitrogen, and stored at –80°C until use.

Peripheral blood mononuclear cells (PBMCs) were isolated from subject blood samples by density gradient centrifugation. In brief, blood was diluted 1:1 with PBS, then layered onto Lymphoprep (Axis-Shield), and centrifuged at 973 g for 30 minutes without brake.

The mononuclear layer was collected and washed with R10. Any remaining red blood cells were lysed with ACK (Ammonium-Chloride-Potassium) solution for 2-3 minutes, and washed again in R10, before cryopreservation in freezing medium as above.

## METHOD DETAILS

### *Ex vivo* stimulation

*Ex vivo* stimulation was performed as previously described (Provine et al., 2018). In brief, purified intestine-derived mononuclear cells were plated at approximately  $10^6$ /well in a 96-well U-bottom plate. Cell stimulation cocktail containing phorbol 12-myristate 13-acetate (PMA) and ionomycin (BioLegend) was added in accordance with manufacturer's instructions in the presence of brefeldin A and monensin (both BioLegend). Cells were incubated at 37°C, 5% CO<sub>2</sub>, for 4 hours.

### Flow cytometry and cell sorting

For surface marker staining, cells were stained in 50  $\mu$ L of FACS buffer (PBS + 1mM EDTA + 0.05% BSA) for 30 minutes at 4°C. Surface antibodies and clones used are listed in the [Key resources table](#).

For intracellular cytokine staining, after surface staining as above, cells were fixed and permeabilised in 100  $\mu$ L Cytofix/Cytoperm solution for 20 minutes at 4°C (BD Biosciences). Cells were then washed twice in Perm/Wash buffer (BD Biosciences). Intracellular staining was performed in 50  $\mu$ L of Perm/Wash buffer (BD Biosciences) for 30 minutes at 4°C using antibodies and clones listed in the [Key resources table](#).

After staining, cells were stored at 4°C protected from light until data acquisition. Flow cytometry data were acquired on a BD LSRIII flow cytometer (BD Biosciences) or Aurora spectral flow cytometer (Cytek). For fluorescence-activated cell sorting (FACS) samples were surface stained as above, with DAPI (Thermo Fisher Scientific) used as viability dye. FACS was performed on an AriaIII (BD Biosciences; 70  $\mu$ m nozzle). Antibodies were purchased from BioLegend, BD Biosciences, Miltenyi Biotec, or Thermo Fisher Scientific.

### Chip cytometry

Samples were frozen in OCT (as described above), cryosectioned onto coverslips and placed in cytometer chips (Zellsafe Tissue chips, Zellkraftwerk, GmbH). Sections were fixed *in situ* at room temperature for 10 minutes using 4% paraformaldehyde, then washed with 10 mL PBS. Non-specific binding was blocked by incubating in 5% goat serum (Thermo Fisher Scientific) in PBS for one hour at room temperature. Fluorophore-conjugated antibodies (see [Key resources table](#)) were diluted for staining in PBS. Immunostaining was performed iteratively, with up to three colors applied simultaneously. Fluorophores were then photobleached and additional antibodies applied to build up the panel (Hennig et al., 2009). Images were acquired using a Zellscanner One Chip cytometer (Zellkraftwerk) and ZellExplorer software.

### 10 $\times$ Genomics library preparation and sequencing

scRNA-seq libraries were generated using 10x Genomics Chromium Single Cell V(D)J Reagents Kits (v1 Chemistry) following manufacturer's instructions. Cells were resuspended in PBS with 0.04% BSA at  $\sim$ 1000 cells/ $\mu$ L and loaded onto a single lane of the Chromium Controller. Captured cell number was 1,774. Library quality and concentration was determined using a TapeStation (Agilent) and Qubit 2.0 Fluorometer (Thermo Fisher Scientific). Libraries were sequenced on an Illumina HiSeq 4000 as per manufacturer's instructions to a mean depth of 63,471 reads/cell. Library generation and sequencing were performed at the Oxford Genomics Centre (Wellcome Centre for Human Genetics, University of Oxford).

### Smart-Seq2 library preparation and sequencing

Single cells were index-sorted into 96-well plates with one cell per well in 2.3  $\mu$ L lysis buffer (0.8% (vol/vol) Triton X-100 and 2 U/ $\mu$ L RNase inhibitor). Smart-Seq2 libraries were generated following the published protocol with External RNA Controls Consortium (ERCC) RNA (1:100,000) added prior to sequencing (Picelli et al., 2014). cDNA was pre-amplified by PCR (21 cycles). Libraries were sequenced on an Illumina HiSeq 4000 with 75 base pair paired-end reads. Library generation and sequencing were performed at the Oxford Genomics Centre (Wellcome Centre for Human Genetics, University of Oxford).

## QUANTIFICATION AND STATISTICAL ANALYSIS

### Graphs and statistical analyses

All statistical analyses and graphs, except transcriptional data, were performed using GraphPad Prism Software Version 8 (La Jolla, CA). Details of specific statistical tests used to determine statistical significance are found in the relevant figure legends. All data are presented as mean  $\pm$  SEM unless stated otherwise.

### Flow cytometry data analysis and statistics

Flow cytometry data were analyzed using FlowJo version 9.9.5 and version 10.6.1 (FlowJo, LLC). For phenotypic analysis of rare cell subsets, populations with fewer than 10 cells were excluded.

### Droplet-based (10× Genomics) scRNA-seq data analysis

FastQ generation, read alignment, barcode counting, and unique molecular identifier (UMI) counting were performed using the Cell Ranger pipeline v2.2.0. Downstream processing steps were performed using Seurat v2.3.4 (Butler et al., 2018; Stuart et al., 2019). Briefly, TCR and BCR genes, and genes expressed in fewer than 10 cells, were removed. Cells with < 3,460 UMIs (local minimum of the UMI distribution to the left of the mode UMI count), < 500 genes, and > 10,000 UMIs, > 2,500 genes, and/or > 10% mitochondrial reads were removed (Figure S2A). Variable genes were identified using M3Drop (Andrews et al., 2019). Data were log normalized and scaled, with cell-cell variation due to UMI counts, percent mitochondrial reads, and S and G2M cell cycle scores regressed out. The top 10 principal components (PCs) were used as input for graph-based clustering (0.4 resolution), as determined by visual inspection of the scree plot. Clusters were visualized by tSNE. Differential gene expression analysis between clusters was performed using the Wilcoxon Rank Sum test (FindMarkers function with default parameters).

### TCR clonotype analysis (10× Genomics)

Single-cell V(D)J sequences and annotations were generated using Cell Ranger v2.2.0. The filtered\_contig\_annotations.csv output file from cellranger vdj was filtered to retain only full-length, productive contigs associated with the TCR $\alpha$  or TCR $\beta$  chain. Cells were filtered to retain only live cells (as determined by gene expression analysis), and to remove cells lacking a TCR $\alpha$  or TCR $\beta$  chain, expressing two TCR $\alpha$  and two TCR $\beta$  chains, or expressing more than two TCR $\alpha$  or TCR $\beta$  chains. TCR clonotypes were defined as cells with identical TCR segment usage, and CDR3 $\alpha$  and CDR3 $\beta$  nucleotide sequences. Assuming some TCR chain dropout, clonotypes were allowed to contain a mixture of cells with a single or two TCR $\alpha$  (or TCR $\beta$ ) chains, so long as all detected chains exactly matched those within the clonotype.

### Plate-based (Smart-Seq2) scRNA-seq data analysis

Reads were trimmed to remove contaminating adaptor and oligo-dT primer sequences using Trimmomatic v0.36 (Bolger et al., 2014). Trimmed reads were aligned to the human genome (hg38 assembly) plus added ERCC “spike-in” sequences using STAR v2.5.3a (–outFilterMismatchNoverLmax 0.04 –outFilterType BySJout –outMultimapperOrder Random) (Dobin et al., 2013). Alignments were filtered using Samtools v1.6 (Li et al., 2009) to retain only primary alignments and properly paired reads. Ensembl gene counts were generated using featureCounts v1.6.0 (–C –B –p) (Liao et al., 2014). Poor quality cells that fit one or more of the following criteria were removed from the analysis (Figures S2G–S2I): small log-library size (< 3 median absolute deviations [MADs] below the median), low percentage of uniquely mapped reads (< 55%), low gene count (< 3 MADs below the median), high percentage of ERCCs (> 37.5%), or high mitochondrial read fraction (> 6%). Outlier cells with a large library size or high gene count (potential doublets) were also removed. Genes with “undetectable” expression were removed (gene defined as “detectable” if at least five read counts in two cells), along with TCR (and BCR) genes. Log-normalized expression values were generated using the normalize function from scater v1.10.1 (McCarthy et al., 2017) with cell-specific size factors calculated using scran v1.12.1 (Lun et al., 2016). Feature selection was performed using M3Drop v3.10.4 (FDR < 0.01) (Andrews et al., 2019) and the expression matrix subset to retain only the selected genes. Clustering analysis was performed using SC3 v1.12.0 (Kiselev et al., 2017). Clusters were visualized by UMAP generated using the top 30 PCs (McInnes et al., 2018). Differential gene expression analysis was performed using DEsingle v1.2.1 (Miao et al., 2018) (FDR < 0.05).

### Data integration with published datasets

For comparison of the T<sub>RM</sub> gene sets with an external non-transplant human dataset (Martin et al., 2019), the web-based graphical interface for the data was used (<https://scdissector.org/martin>). Ileal T cell clusters with high expression of CD8A and CD8B, and low expression of CD4, were chosen for analysis. Consensus DEGs between populations 1 and 2 identified in both scRNA-seq datasets (Figure 3D) were examined, with hierarchical clustering of the expression of genes performed.

For analysis of the scRNA-seq data of colonic CD8<sup>+</sup> T cells from healthy and ulcerative colitis patients, published in Corridoni et al. (2020), the authors supplied us with a Seurat object containing the data presented in Figure 4B of their study. The resting, conventional CD8<sup>+</sup> T cell clusters were retained for analysis: FGFBP2<sup>+</sup>, GZMK<sup>+</sup> (1), GZMK<sup>+</sup> (2), TRM, Memory, IELs, IL26<sup>+</sup>. Hierarchical clustering was performed using the average expression of all genes to establish the relationship between these seven clusters. A heatmap was generated showing the average expression of the 30 DEGs between CD103<sup>+</sup> and CD103<sup>−</sup> T<sub>RM</sub> cells that coincided between experiment 1 and experiment 2.

For Gene Set Enrichment Analysis (GSEA) within DEGs between murine intestinal T<sub>RM</sub> cell clusters post-LCMV infection (Kurd et al., 2020), a gene set associated with population 2/CD103<sup>−</sup> T<sub>RM</sub> cells identified in this study was created. This included all genes differentially expressed in either experiment, and showing congruent direction of fold change in both experiments. These genes were converted to murine orthologs using DAVID Bioinformatics Resources 6.7 (<https://david.ncifcrf.gov/>) (Huang et al., 2009) and Mouse Genome Database (MGD) at the Mouse Genome Informatics website (<http://www.informatics.jax.org>). GSEA was performed using GSEA v4.0.3 (<http://www.gsea-msigdb.org/gsea>) (Subramanian et al., 2005).

### Identification of TF regulons

TF regulons were identified using the SCENIC workflow (Aibar et al., 2017; Van de Sande et al., 2020). Briefly, the single-cell log-normalized gene expression matrix was further filtered to remove genes expressed in fewer than 1% of cells or with a total raw count

of less than 30 UMIs. Potential target genes for a supplied list of human TFs ([Lambert et al., 2018](#)) were identified based on co-expression using the GRNBoost2 algorithm ([Moerman et al., 2019](#)). Co-expression modules were filtered using cis-regulatory motif analysis (RcisTarget) to retain only modules enriched for putative direct-binding targets of the corresponding TF, and remaining modules were pruned to remove targets lacking motif support. Where multiple modules were identified for a TF, these were combined to result in a single regulon per TF. Finally, cells were scored for the activity of each TF regulon using the AUCell algorithm. The Wilcoxon Rank Sum test (FindMarkers function, Seurat R package) was used to identify regulons with a statistically increased AUCell score in a given cluster relative to all other clusters.



**Cell Reports, Volume 34**

## **Supplemental Information**

### **Human intestinal tissue-resident memory T cells comprise transcriptionally and functionally distinct subsets**

**Michael E.B. FitzPatrick, Nicholas M. Provine, Lucy C. Garner, Kate Powell, Ali Amini, Sophie L. Irwin, Helen Ferry, Tim Ambrose, Peter Friend, Georgios Vrakas, Srikanth Reddy, Elizabeth Soilleux, Paul Klenerman, and Philip J. Allan**

## Supplemental material

**Figures (below):**

- **Figure S1**
- **Figure S2**
- **Figure S3**
- **Figure S4**
- **Figure S5**

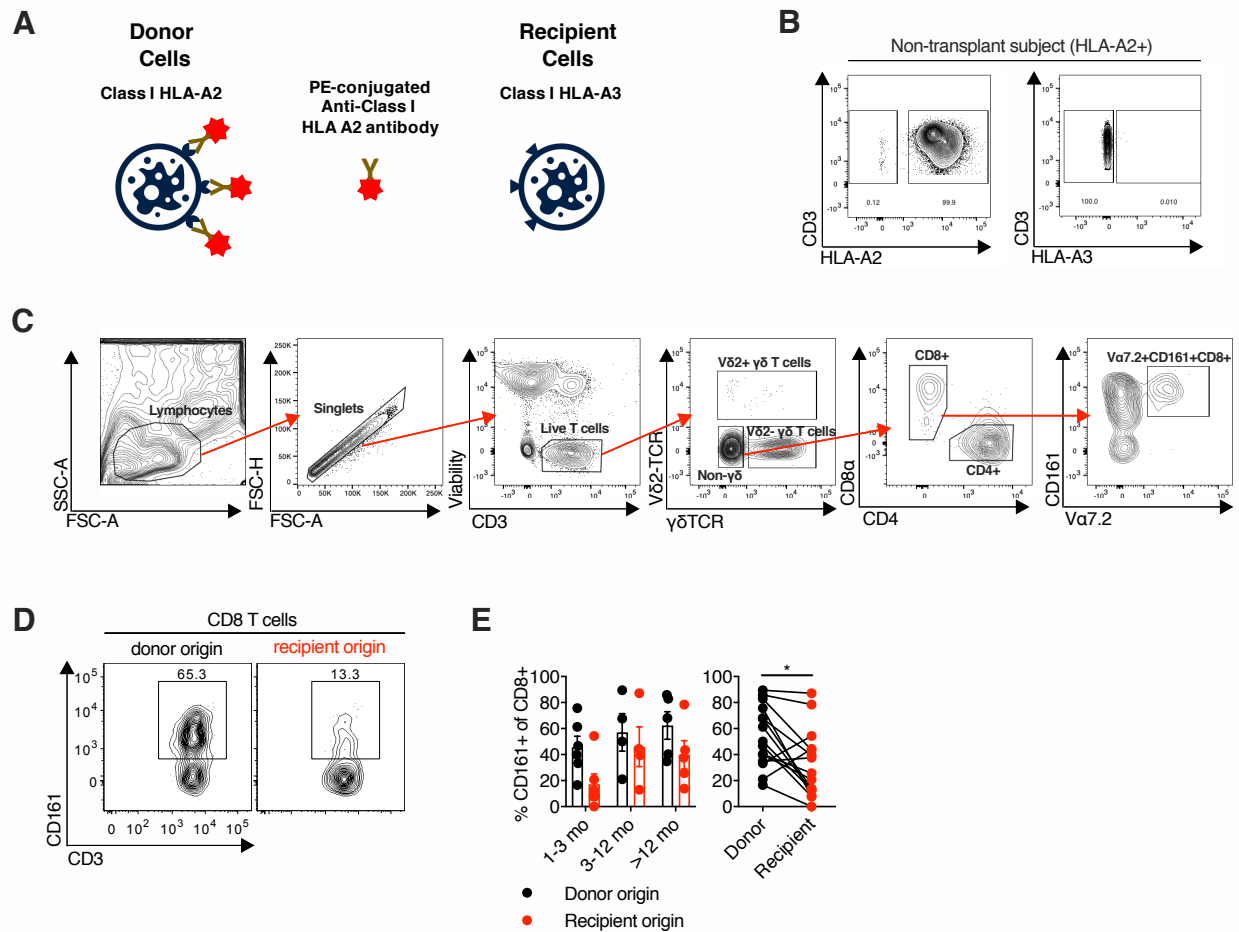

**Figure S1 (related to Figure 1).**

(A) Illustration demonstrating the principle of HLA allele congenic cell tracking to identify donor- and recipient-derived T cell populations in the transplanted small intestinal graft using fluorophore-conjugated antibodies to Class I HLA haplotypes discordant between donor and recipient.

(B) Representative flow cytometry plot of Class I HLA non-specific staining (0.01-0.12%) from a non-transplant PBMC sample. Gated on live CD3+ T cells.

(C) Representative flow cytometry gating scheme for identification of T cell subsets.

(D) Representative flow cytometry plot of CD161 expression on paired donor- and recipient-derived CD8+ intestinal T cells.

(E) Percentage of CD161+ donor- and recipient-derived CD8+ intestinal T cells categorised by time post-transplant (left), or grouped, with paired samples connected by black lines (right) (n=15 (8 subjects); mean +/- SEM).

Statistical analysis performed with Wilcoxon matched-pairs signed rank test. \* P ≤ 0.05.

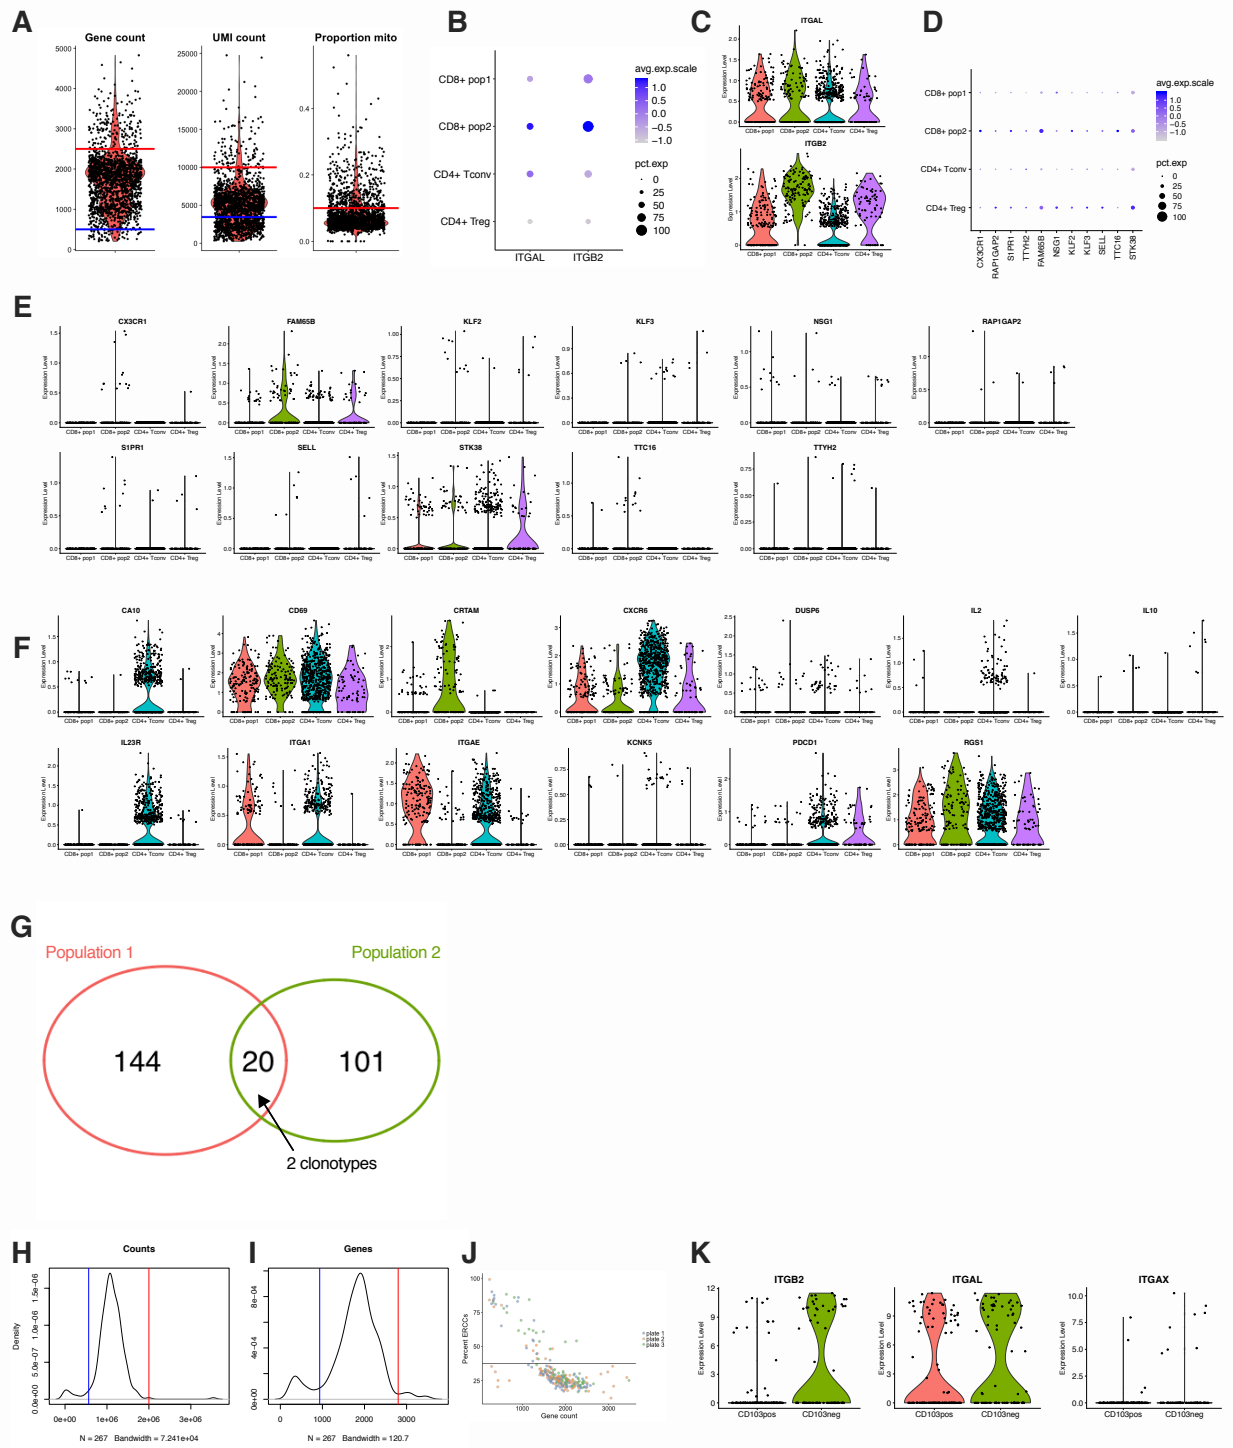

**Figure S2 (related to Figure 2 and 3).**

(A) Quality control parameters and thresholds for 10x Genomics scRNAseq Experiment 1. Number of genes per cell (left), number of unique molecular identifiers (UMIs) per cell (centre), and percentage of mitochondrial reads per cell (right) are displayed. Each dot represents a single cell, with red and blue lines indicating maximum and minimum thresholds, respectively.

(B) Dot plot showing expression of *ITGB2* and its potential heterodimeric partner *ITGAL* in Experiment 1. Other potential heterodimeric alpha integrin partners, *ITGAD*, *ITGAM*, and *ITGAX* were not detected. Dot size indicates the proportion of cells in which the gene is expressed. Colour intensity indicates the mean expression level of the gene.

(C) Violin plots showing expression of *ITGB2* and its potential heterodimeric partner *ITGAL* in Experiment 1. Other potential heterodimeric alpha integrin partners, *ITGAD*, *ITGAM*, and *ITGAX* were not detected.

(D) Dot plot showing expression in Experiment 1 of 11 genes previously negatively associated with tissue residency (downregulated in human CD69+ cells in comparison to CD69- T cells (Kumar et al., 2017)). Dot size indicates the proportion of cells in which the gene is expressed. Colour intensity indicates the mean expression level of the gene. Other genes in the gene set were not detected in the data (*SBK1*, *NPDC1*, *KRT72*, *SOX13*, *KRT73*, *TSPAN18*, *PTGDS*).

(E) Violin plots showing expression in Experiment 1 of 11 genes previously negatively associated with tissue residency (downregulated in human CD69+ cells in comparison to CD69- T cells (Kumar et al., 2017)).

(F) Violin plots showing expression in Experiment 1 of 13 genes previously associated with tissue residency in human CD69+ T cells (Kumar et al., 2017), demonstrating variable expression in conventional T cell clusters.

(G) Venn diagram showing the number of cells with TCR clonotypes unique to population 1 or 2, or shared between population 1 and 2 in Experiment 1.

(H-J) Quality control parameters and thresholds for Smart-Seq2 scRNAseq Experiment 2. (H) Histogram of number of reads per cell and (I) number of genes per cell. Red and blue lines indicate maximum and minimum thresholds, respectively. (J) Plot showing the percentage of External RNA Controls Consortium (ERCC) spike-ins per cell against the number of genes per cell. Black line indicates upper threshold.

(K) Violin plots showing expression of *ITGB2* and its potential heterodimeric partners *ITGAL* and *ITGAX* in Experiment 2. *ITGAD* and *ITGAM* were not detected in the data.

**A**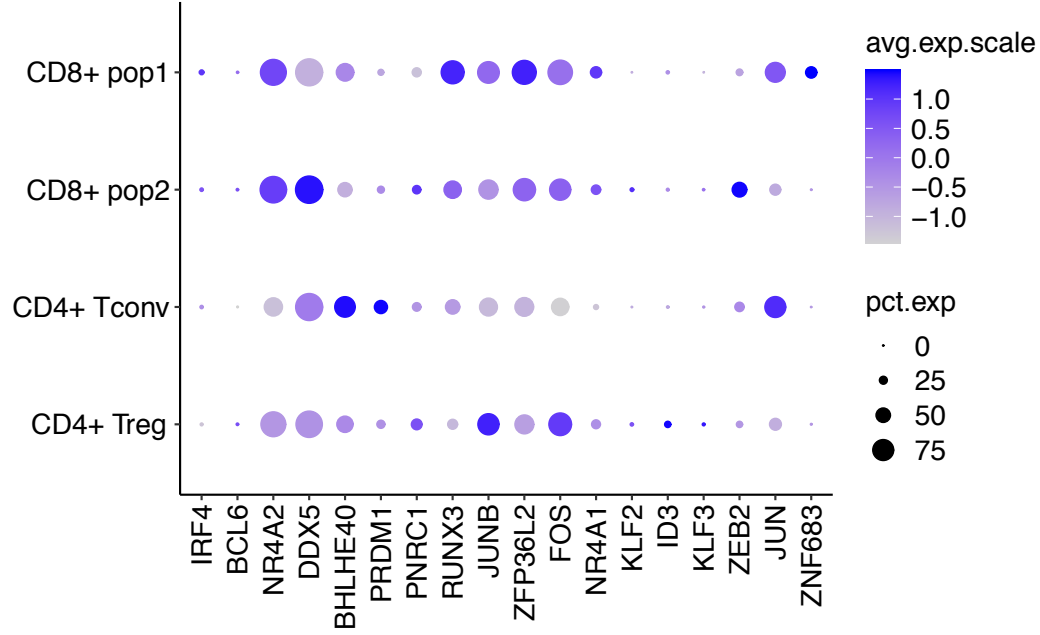**B**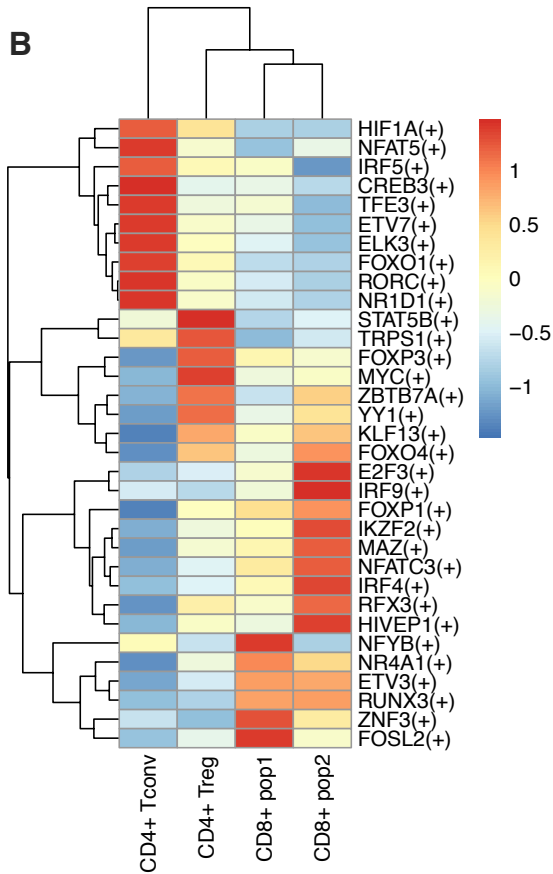**C**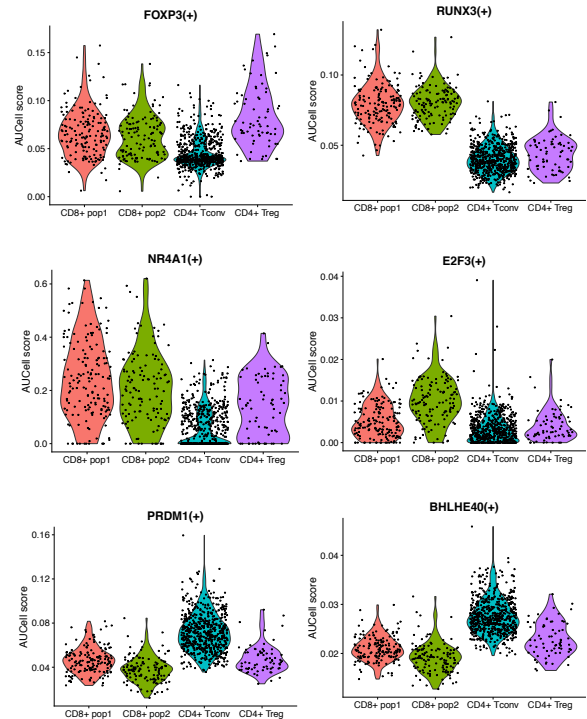

**Figure S3 (related to Figures 2 and 3).**

(A) Dot plot showing expression of a curated list of TFs linked to tissue residency in prior publications in  $T_{RM}$  cell clusters in Experiment 1. Dot size indicates the proportion of cells in which the gene is expressed. Colour intensity indicates the mean expression level of the gene.

(B) Heatmap showing the activity of TF regulons (gene sets predicted to be regulated by a given TF) in  $T_{RM}$  cell clusters in Experiment 1. The top 10 regulons with significantly increased activity (FDR<0.001) in each cluster are shown.

(C) Violin plots showing the activity of FOXP3, RUNX3, NR4A1, E2F3, PRDM1, and BHLHE40 regulons in  $T_{RM}$  cell clusters in Experiment 1.

**A**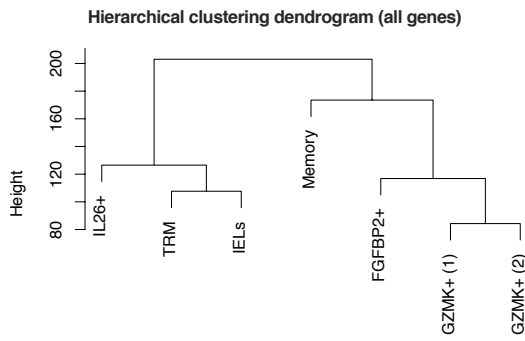**B**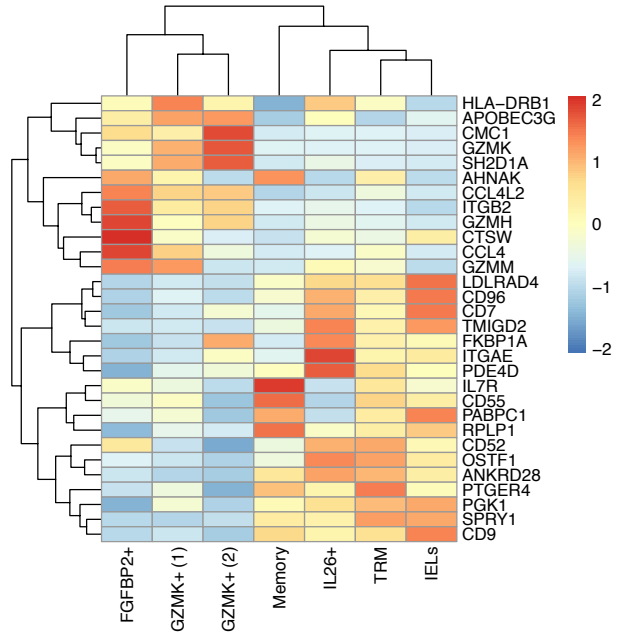**C**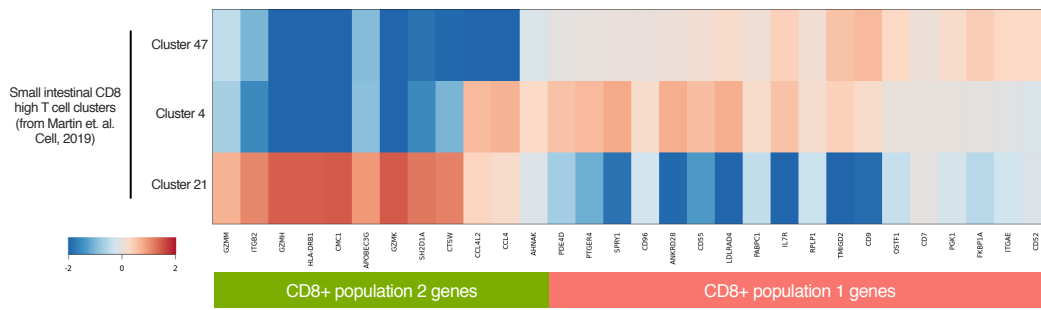**D**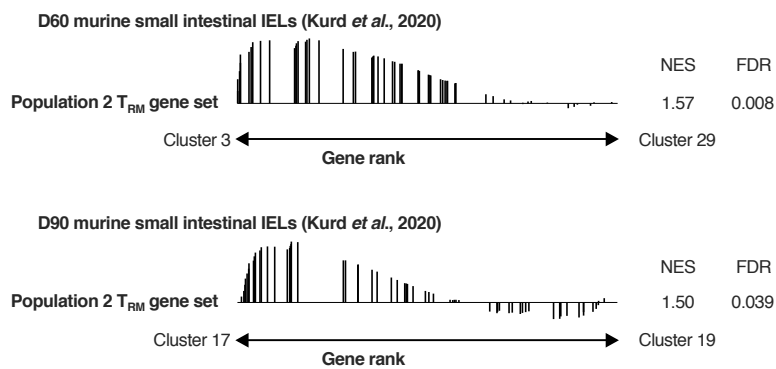



**Figure S4 (related to Figure 3).**

(A-B) Examination of transcriptional profiles of conventional CD8<sup>+</sup> intestinal T cells from human colon samples (published in (Corridoni et al., 2020)). (A) Hierarchical clustering of colonic CD8<sup>+</sup> T cell clusters based on total gene expression. (B) Heatmap of expression of the T<sub>RM</sub> cell subset transcriptional signature within CD8<sup>+</sup> colonic T cells. (C) Normalized expression of the T<sub>RM</sub> cell subset transcriptional signature within CD8A/CD8B<sup>hi</sup> and CD4<sup>lo</sup> intestinal T cell clusters from human ileum samples (published in (Martin et al., 2019)). (D) Gene Set Enrichment Analysis showing the enrichment of a gene set associated with human CD103<sup>-</sup> T<sub>RM</sub> cells from this study in clusters of murine intestinal T<sub>RM</sub> cells at day 60 (D60) and day 90 (D90) post-LCMV infection. NES, normalized enrichment score. FDR, false discovery rate (<0.25 considered significant).

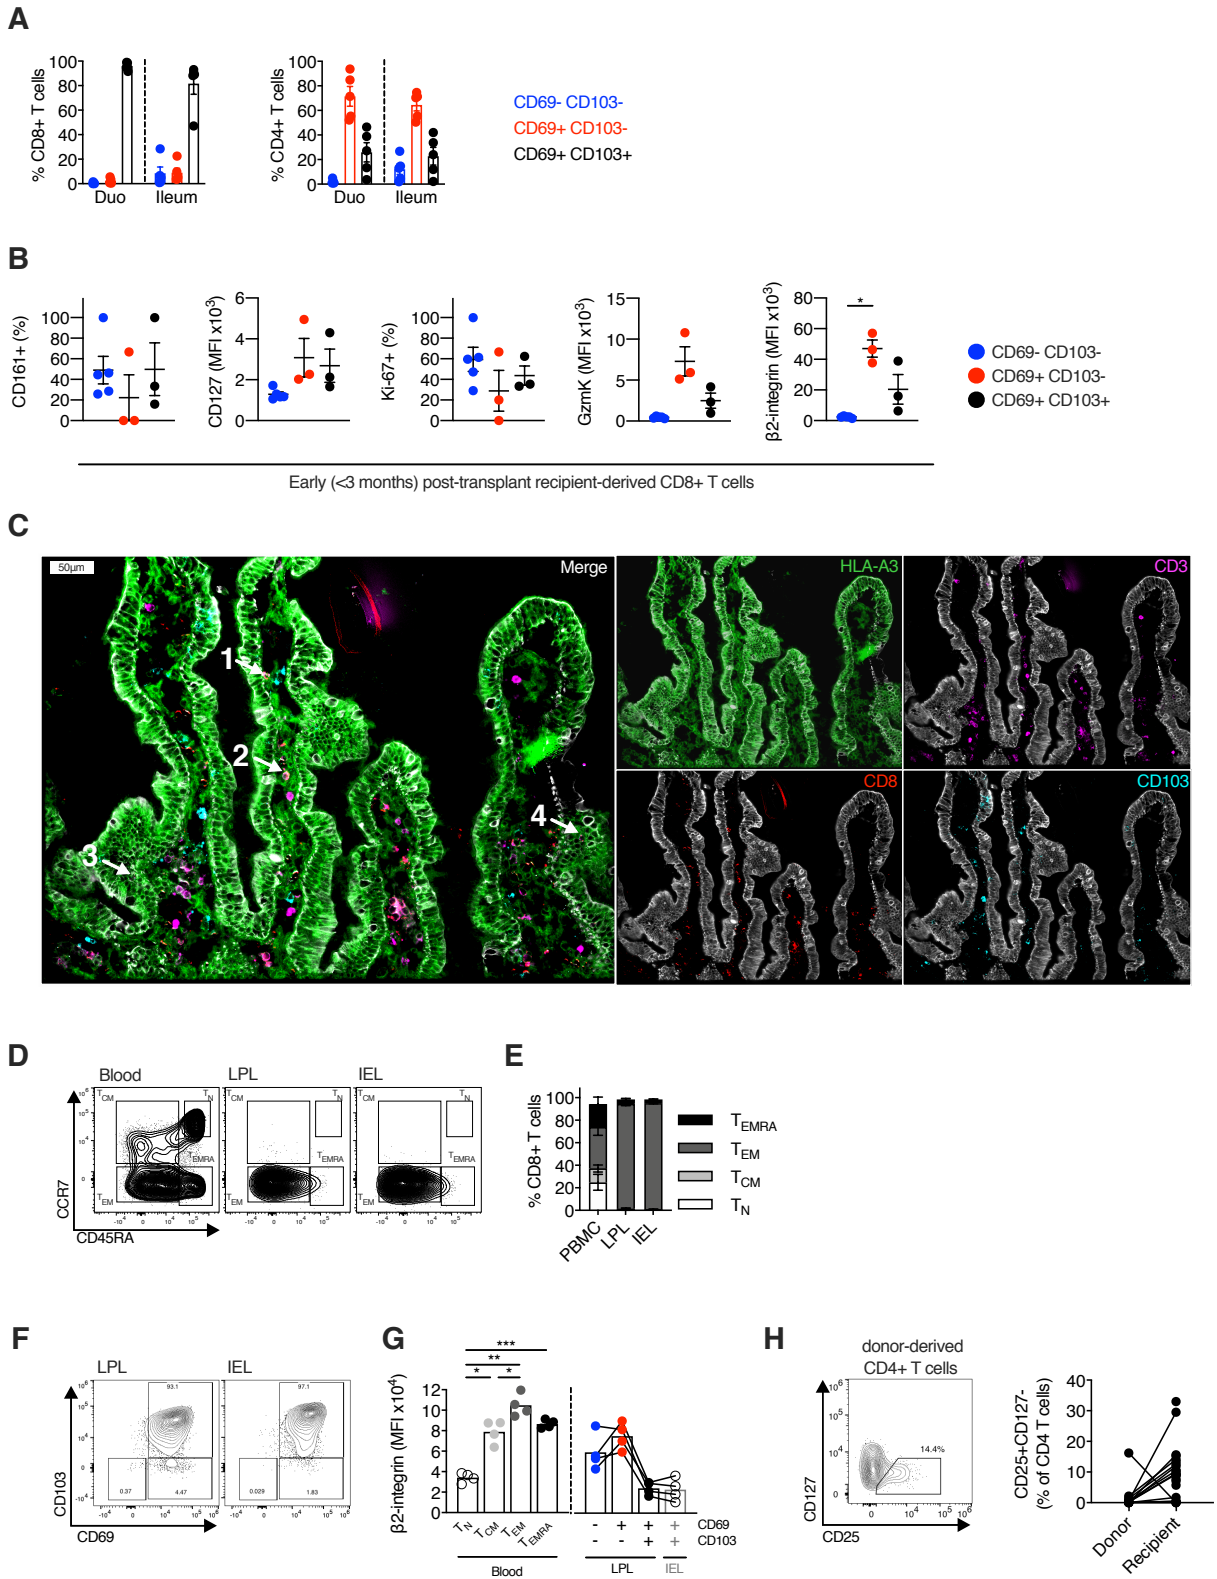

**Figure S5 (related to Figure 4 and 5).**

(A) The proportion of CD8<sup>+</sup> T cells co-expressing CD69 and CD103 in small intestinal biopsies from the duodenum (Duo) or ileum from healthy control subjects (n=5 for both duodenum and ileum).

(B) Phenotypic analysis of recipient-derived CD8<sup>+</sup> T cell populations infiltrating the intestinal graft in the early post-transplant period (<3 months). Proportion of CD161<sup>+</sup> cells, Ki-67<sup>+</sup> cells or MFI of CD127, granzyme K, and  $\beta$ 2-integrin of recipient-derived CD8<sup>+</sup> T cells, categorised by CD69 and CD103 expression, in intestinal transplant grafts at early (<3 months) timepoints post-transplantation (n=5; 2 subjects). Mean percentage or MFI represented by bars. Black lines connect populations from the same sample.

(C) Fluorescence microscopy chip cytometry image from a separate section from the same donor as Fig. 5A. False colour fluorescence imaging for cytokeratin (grey), CD3 (purple), CD8 (red), CD103 (blue), and HLA-A3 (green). Representative donor-derived CD8<sup>+</sup> CD103<sup>+</sup> and CD103<sup>-</sup> cells for further characterization (Fig. 5C) are numbered.

(D-G) CD8<sup>+</sup> T cell memory status and phenotype in intestinal epithelium and peripheral blood. (D) Representative plot of CCR7 and CD45RA expression of circulating, lamina propria lymphocyte (LPL), and intra-epithelial lymphocyte (IEL) CD8<sup>+</sup> T cells, identifying naïve (T<sub>N</sub>), central memory (T<sub>CM</sub>), effector memory (T<sub>EM</sub>), and terminally differentiated effector memory (T<sub>EMRA</sub>) populations. (E) Stacked plots showing mean percentage (+/- SEM) of CD8<sup>+</sup> T cells comprising naïve (T<sub>N</sub>; white), central memory (T<sub>CM</sub>; light grey), effector memory (T<sub>EM</sub>; dark grey), and terminally differentiated effector memory (T<sub>EMRA</sub>; black) populations (n=4). (F) Representative flow cytometry plot of CD69 and CD103 expression on LPL and IEL T cells. (G) MFI of  $\beta$ 2-integrin expression on circulating, LPL, and IEL CD8<sup>+</sup> T cells (n=4). Mean percentage or MFI represented by bars. Connecting lines represent populations from the same subject.

(H) Representative flow cytometry gating of CD4<sup>+</sup> CD25<sup>+</sup>CD127<sup>lo</sup> T cells. Percentage of donor- or recipient-derived intestinal CD4<sup>+</sup> CD25<sup>+</sup>CD127<sup>lo</sup> T cells. Connecting lines represent populations from the same subject (n=23).

Statistical analysis performed with one-way ANOVA with Tukey's multiple comparison test. \* P  $\leq$  0.05; \*\* P  $\leq$  0.01; \*\*\* P  $\leq$  0.001; \*\*\*\* P  $\leq$  0.0001.
